# Supplementary material
Source: publisher figshare collection journal article supplement (https://acs.figshare.com/ndownloader/files/5115961)
Supplement: Supplementary file 1 [file 5115961]

# Supporting Information

for

## “A Convenient Enantioselective Synthesis of (*S*)- $\alpha$ -Trifluoromethylisoserine”

submitted to *The Journal of Organic Chemistry* as a **NOTE** by:

*Alberto Avenoza,\* Jesús H. Busto, Gonzalo Jiménez-Osés and Jesús M. Peregrina\**

### CONTENTS

|                                                                                                                                                                                                   |         |
|---------------------------------------------------------------------------------------------------------------------------------------------------------------------------------------------------|---------|
| Experimental procedures and a full listing of $^1\text{H}$ , $^{13}\text{C}$ NMR and $^{19}\text{F}$ NMR data for all new compounds (4 pages).....                                                | S2-S5   |
| $^1\text{H}$ and $^{13}\text{C}$ NMR spectra for compounds as well as $^1\text{H}$ - $^1\text{H}$ and $^1\text{H}$ - $^{13}\text{C}$ correlations for the most relevant compounds (25 pages)..... | S6-S30  |
| Enantiomeric excess for Sharpless asymmetric dihydroxylation determined by GC-MS (1 page).....                                                                                                    | S31     |
| Computational energy data and the coordinates for structures (7 pages).....                                                                                                                       | S32-S37 |

## Experimental procedures and a full listing of $^1\text{H}$ , $^{13}\text{C}$ NMR and $^{19}\text{F}$ NMR data, completed with peak assignments for all new compounds

### General Procedures

Unless otherwise stated, all starting materials were obtained from commercial suppliers and used without further purification. Melting points are uncorrected. All manipulations involving air-sensitive reagents were carried out under a dry argon atmosphere using standard Schlenk techniques. Solvents were purified according to standard procedures. Analytical TLC was performed using Polychrom SI F<sub>254</sub> plates. Column chromatography was performed using Kieselgel 60 (230–400 mesh). Organic solutions were dried over anhydrous Na<sub>2</sub>SO<sub>4</sub> and, when necessary, concentrated under reduced pressure using a rotary evaporator. NMR spectra were recorded at 300 or 400 MHz ( $^1\text{H}$ ), at 75 or 100 MHz ( $^{13}\text{C}$ ) and 282 MHz ( $^{19}\text{F}$ ) and are reported in ppm downfield from TMS; coupling constants ( $J$ ) in Hz. Microanalyses were carried out on a elemental analyser and were in good agreement with the calculated values. Mass spectra were obtained by electrospray ionization (ESI).

### Benzyl 2-(trifluoromethyl)acrylate (**2b**)

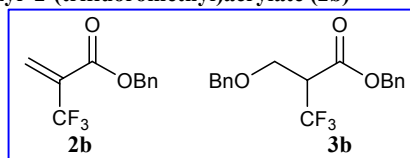

2-(Trifluoromethyl)acrylic acid **2a** (989 mg, 7.06 mmol), 2-chloro-1-methylpyridinium iodide (2.19 g, 8.31 mmol) and triethylamine (TEA) (2.40 mL, 16.61 mmol) were dissolved in CH<sub>2</sub>Cl<sub>2</sub> (50 mL) at RT. Furthermore, benzylic alcohol (0.86 mL) was added and the mixture was stirred for 16 h at reflux. The solution was then evaporated and the reaction crude was purified by flash column chromatography (hexane/CH<sub>2</sub>Cl<sub>2</sub>, 8:2) to give compound **2b** (540 mg, 34%) as a colorless liquid and the racemic sideproduct benzyl 3-(benzyloxy)-2-(trifluoromethyl)propanoate **3b** (18%).

**Compound 3b**: ESI+ ( $m/z$ ) = 339.3.  $^1\text{H}$  NMR (400 MHz, CDCl<sub>3</sub>):  $\delta$  3.52 (m, 1H); 3.86 (dd, 1H,  $J$  = 4.8 Hz,  $J$  = 9.5); 3.92–3.99 (m, 1H); 4.51 (s, 2H); 5.19–5.28 (m, 2H); 7.22–7.37 (m, 10H).  $^{13}\text{C}$  NMR (100 MHz, CDCl<sub>3</sub>):  $\delta$  51.1 (q,  $^2J_{\text{CF}}$  = 27.2); 65.4 (q,  $^3J_{\text{CF}}$  = 2.9); 67.6; 73.5; 123.6 (q,  $^1J_{\text{CF}}$  = 280.2); 127.6; 127.9; 128.1; 128.4; 128.6; 134.9; 131.1; 165.8 (q,  $^3J_{\text{CF}}$  = 3.2, CO). Anal. Calcd. for C<sub>18</sub>H<sub>17</sub>F<sub>3</sub>O<sub>3</sub>: C, 63.90; H, 5.06. Found: C, 64.01; H, 5.13.

**Compound 2b**: ESI+ ( $m/z$ ) = 231.2.  $^1\text{H}$  NMR (400 MHz, CDCl<sub>3</sub>):  $\delta$  5.30 (s, 2H); 6.45 (d, 1H,  $J$  = 1.1); 6.75 (d, 1H,  $J$  = 1.7); 7.31–7.42 (m, 5H).  $^{13}\text{C}$  NMR (100 MHz, CDCl<sub>3</sub>):  $\delta$  67.4; 121.3 (q,  $^1J_{\text{CF}}$  = 271.1); 128.0; 128.5; 128.7; 131.5 (q,  $^2J_{\text{CF}}$  = 32.0, CCF<sub>3</sub>); 132.9 (q,  $^3J_{\text{CF}}$  = 2.5); 135.0; 161.1.  $^{19}\text{F}$  NMR (282 MHz, CDCl<sub>3</sub>):  $\delta$  –64.4 (s). Anal. Calcd. for C<sub>11</sub>H<sub>9</sub>F<sub>3</sub>O<sub>2</sub>: C, 57.40; H, 3.94. Found: C, 57.56; H, 3.83.

### 2-(Trifluoromethyl)-*N*-methoxy-*N*-methylacrylamide (**2c**)

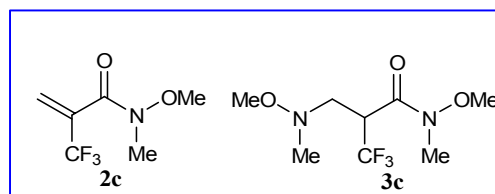

A solution of *N*,*O*-dimethylhydroxylamine (933 mg, 9.37 mmol), freshly prepared by slow addition of DIEA over the corresponding hydrochloride suspended in CH<sub>2</sub>Cl<sub>2</sub> (50 mL) at 0 °C, was added to a solution of acid **2a** (1.12 g, 7.83 mmol) in CH<sub>2</sub>Cl<sub>2</sub> at –40 °C. Then DCC (1.95 g, 9.37 mmol) was added and the mixture was stirred at 0 °C for 16 h. The suspension was filtered and the evaporated residue was treated with cold hexane. The resulting suspension was filtered again and concentrated to obtain a reaction crude that was purified by flash column chromatography (hexane/ethyl acetate, 8.5:1.5) to give compound **2c** (1.21 g, 83%) as a colorless liquid and the racemic sideproduct 3-(*N*-methoxy-*N*-methylamino)-2-(trifluoromethyl)-*N*-methoxy-*N*-methylpropanamide **3c** (8%).

**Compound 3c**: ESI+ ( $m/z$ ) = 245.3.  $^1\text{H}$  NMR (400 MHz, CDCl<sub>3</sub>):  $\delta$  2.58 (s, 3H); 2.92 (dd, 1H,  $J$  = 2.9 Hz,  $J$  = 12.9); 3.23–3.34 (m, 4H); 3.45 (s, 3H); 3.76 (s, 3H) 4.15–4.30 (m, 1H).  $^{13}\text{C}$  NMR (100 MHz, CDCl<sub>3</sub>):  $\delta$  32.3; 42.8 (q,  $^2J_{\text{CF}}$  = 26.1); 44.9; 56.7; 59.4; 61.4; 124.5 (q,  $^1J_{\text{CF}}$  = 280.3); 167.2. Anal. Calcd. for C<sub>8</sub>H<sub>15</sub>F<sub>3</sub>N<sub>2</sub>O<sub>3</sub>: C, 39.35; H, 6.19; N, 11.47. Found: C, 39.48; H, 6.23; N, 11.32.

**Compound 2c**: ESI+ ( $m/z$ ) = 184.1.  $^1\text{H}$  NMR (300 MHz, CDCl<sub>3</sub>):  $\delta$  3.27 (s, 3H); 3.63 (s, 3H); 5.97 (s, 1H); 6.13 (s, 1H).  $^{13}\text{C}$  NMR (75 MHz, CDCl<sub>3</sub>):  $\delta$  32.7; 61.2; 121.4 (q,  $^1J_{\text{CF}}$  = 271.9); 125.1 (q,  $^3J_{\text{CF}}$  = 2.5); 134.4 (q,  $^2J_{\text{CF}}$  = 32.6); 163.3.  $^{19}\text{F}$  NMR (282 MHz, CDCl<sub>3</sub>):  $\delta$  –64.4 (s). Anal. Calcd. for C<sub>6</sub>H<sub>8</sub>F<sub>3</sub>NO<sub>2</sub>: C, 39.35; H, 4.40; N, 7.65. Found: C, 39.51; H, 4.32; N, 7.69.

### Sharpless asymmetric aminohydroxylation of olefin **2c**: 3-Acetamido-2-(trifluoromethyl)-*N*-methoxy-*N*-methylpropanamide (**3d**)

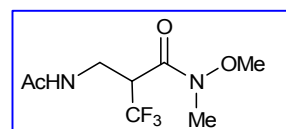

A round-bottomed flask was charged with H<sub>2</sub>O (2 mL), LiOH·H<sub>2</sub>O (28 mg, 0.67 mmol) and K<sub>2</sub>OsO<sub>4</sub>·2H<sub>2</sub>O (10 mg) to give a clear pink solution. (DHQD)<sub>2</sub>PHAL (25 mg) and *tert*-butyl alcohol (4 mL) were added and the mixture was stirred at 25 °C until both phases were clear. H<sub>2</sub>O (4 mL) was then added and the mixture cooled to 0 °C for 30 min. Olefin **2c** (120 mg, 0.66 mmol) and *N*-bromoacetamide (99 mg, 0.73 mmol) were added in a single portion. The color mixture became dark green at this point, and was stirred at 0 °C for 24 h, whereupon its color slowly turned into red. The reaction was quenched by addition of sodium sulphite (325 mg, 2.58 mmol) and then stirred at 25 °C for 1 h. The reaction mixture was extracted with ethyl acetate (3×10 mL) and then dried

(Na<sub>2</sub>SO<sub>4</sub>) and concentrated. The residue was purified by column chromatography (hexane/ethyl acetate, 4:6) to give, in the place of aminohydroxylation products, racemic compound **3d** (coming from the Michel addition of acetamide on olefin **2c**) and dihydroxylation product (10% of **4c**) in a 90/10 ratio. **Compound 3d**: (colorless oil, 134 mg, 84%). [ $\alpha$ ]<sub>D</sub><sup>24</sup> (*c* 1.00, CHCl<sub>3</sub>) = 0.0. ESI+ (*m/z*) = 243.2. <sup>1</sup>H NMR (400 MHz, CDCl<sub>3</sub>):  $\delta$  1.98 (s, 3H); 3.25 (s, 3H); 3.49-3.62 (m, 1H); 3.72 (s, 3H); 3.76-3.88 (m, 1H); 4.17-4.33 (m, 1H), 6.60 (br s, 1H). <sup>13</sup>C NMR (100 MHz, CDCl<sub>3</sub>):  $\delta$  22.7; 32.0; 36.5; 43.8 (q, <sup>2</sup>*J*<sub>CF</sub> = 25.8); 61.6; 124.1 (q, <sup>1</sup>*J*<sub>CF</sub> = 279.1); 168.2; 170.9. Anal. Calcd. for C<sub>8</sub>H<sub>13</sub>F<sub>3</sub>N<sub>2</sub>O<sub>3</sub>: C, 39.67; H, 5.41; N, 11.57. Found: C, 39.78; H, 5.45; N, 11.42.

**Benzyl (S)-2-(trifluoromethyl)-2,3-dihydroxypropanoate [(S)-4b, 66% ee]\***

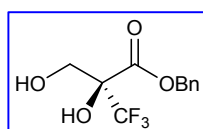

A round-bottomed flask was charged with *tert*-butyl alcohol (12 mL), H<sub>2</sub>O (12 mL), AD-mix- $\beta$  (3.31 g), K<sub>2</sub>OsO<sub>4</sub>·2H<sub>2</sub>O (40 mg), (DHQD)<sub>2</sub>PHAL (94 mg) and methanesulfonamide (232 mg, 2.37 mmol). The mixture was stirred at 25 °C until both phases are clear, and then cooled to 0 °C, whereupon the inorganic salts partially precipitated. Olefin **2b** (540 mg, 2.37 mmol) was added and the heterogeneous slurry was vigorously stirred at 0 °C for 24 h. The reaction was quenched by addition of sodium sulphite (3.56 g) and then stirred for 1 h. The reaction mixture was extracted with ethyl acetate (3×60 mL) and then dried (Na<sub>2</sub>SO<sub>4</sub>) and concentrated. The residue was purified by column chromatography (hexane/ethyl acetate, 8:2) to give compound **(S)-4b** (543 mg, 87%, 66% ee)\* as a colorless oil. ESI+ (*m/z*) = 265.3. [ $\alpha$ ]<sub>D</sub><sup>24</sup> (*c* 2.21, CHCl<sub>3</sub>) = -14.5. <sup>1</sup>H NMR (400 MHz, CDCl<sub>3</sub>):  $\delta$  2.97 (br s, 1H); 3.87 (d, 1H, *J* = 11.7); 4.07 (d, 1H, *J* = 11.7); 4.53 (br s, 1H); 5.26-5.35 (m, 2H); 7.33-7.38 (m, 5H). <sup>13</sup>C NMR (100 MHz, CDCl<sub>3</sub>):  $\delta$  62.2; 69.3; 78.6 (q, <sup>2</sup>*J*<sub>CF</sub> = 28.3); 122.5 (q, <sup>1</sup>*J*<sub>CF</sub> = 284.5); 127.0; 128.0; 128.7; 131.4; 168.2. <sup>19</sup>F NMR (282 MHz, CDCl<sub>3</sub>):  $\delta$  -76.5 (s). Anal. Calcd. for C<sub>11</sub>H<sub>11</sub>F<sub>3</sub>O<sub>4</sub>: C, 50.01; H, 4.20. Found: C, 49.87; H, 4.31.

**(S)-2-(Trifluoromethyl)-2,3-dihydroxy-N-methoxy-N-methylpropanamide [(S)-4c, 90% ee]\***

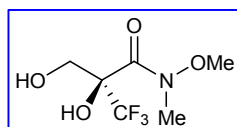

A round-bottomed flask was charged with *tert*-butyl alcohol (27 mL), H<sub>2</sub>O (27 mL), AD-mix- $\beta$  (7.51 g), K<sub>2</sub>OsO<sub>4</sub>·2H<sub>2</sub>O (90 mg), (DHQD)<sub>2</sub>PHAL (213 mg) and methanesulfonamide (526 mg, 5.37 mmol). The mixture was stirred at 25 °C until both phases are clear, and then cooled to 0 °C, whereupon the inorganic salts partially precipitated. Olefin **2c** (983 mg, 5.37

mmol) was added and the heterogeneous slurry was vigorously stirred at 0 °C for 24 h. The reaction was quenched by addition of sodium sulphite (8.06 g) and then stirred for 1 h. The reaction mixture was extracted with ethyl acetate (3×100 mL) and then dried (Na<sub>2</sub>SO<sub>4</sub>) and concentrated. The residue was purified by column chromatography (hexane/ethyl acetate, 7:3) to give compound **(S)-4c** (1.05 mg, 90%, 90% ee)\* as a colorless oil. [ $\alpha$ ]<sub>D</sub><sup>24</sup> (*c* 1.28, CHCl<sub>3</sub>) = -28.9. ESI+ (*m/z*) = 218.1. <sup>1</sup>H NMR (400 MHz, CDCl<sub>3</sub>):  $\delta$  2.60 (br s, 1H); 3.36 (s, 3H); 3.77 (s, 3H); 3.93 (d, 1H, *J* = 11.8); 4.25 (d, 1H, *J* = 11.8); 5.24 (s, 1H). <sup>13</sup>C NMR (100 MHz, CDCl<sub>3</sub>):  $\delta$  34.1; 61.1; 62.2 (q, <sup>3</sup>*J*<sub>CF</sub> = 1.6); 79.1 (q, <sup>2</sup>*J*<sub>CF</sub> = 28.4); 122.9 (q, <sup>1</sup>*J*<sub>CF</sub> = 284.6); 165.7. <sup>19</sup>F NMR (282 MHz, CDCl<sub>3</sub>):  $\delta$  -75.2 (s). Anal. Calcd. for C<sub>6</sub>H<sub>10</sub>F<sub>3</sub>NO<sub>4</sub>: C, 33.19; H, 4.64; N, 6.45. Found: C, 33.02; H, 4.76; N, 6.36.

**(R)-2-(Trifluoromethyl)-2,3-dihydroxy-N-methoxy-N-methylpropanamide [(R)-4c, 90% ee]\***

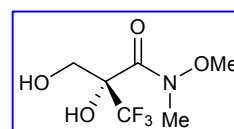

The same protocol using AD-mix- $\alpha$  and the proper amount of (DQD)<sub>2</sub>PHAL lead to **(R)**-diol. [ $\alpha$ ]<sub>D</sub><sup>24</sup> (*c* 0.87, CHCl<sub>3</sub>) = +29.2.

**Methyl (S)-2-(trifluoromethyl)-2,3-dihydroxypropanoate [(S)-4d]**

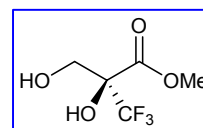

To a solution of compound **(S)-4c** (624 mg, 2.87 mmol) in H<sub>2</sub>O/MeOH (1:3, 20 mL), LiOH·H<sub>2</sub>O (603 mg, 14.35 mmol) was added and the mixture was stirred at 25 °C for 2 h. The *N,O*-dimethylhydroxylamine formed in the reaction and MeOH were removed and the mixture was acidified with conc. HCl to pH 1-2. After removing the solvent, the white solid was dissolved in HCl/MeOH, prepared by dropwise addition of AcCl (15 mL) to MeOH (60 mL) at 0 °C, and the mixture was heated under reflux for 12 h. The mixture was concentrated and the residue partitioned between H<sub>2</sub>O (20 mL) and CHCl<sub>3</sub>/isopropanol (3:1, 30 mL). The aqueous layer was successively washed with CHCl<sub>3</sub>/isopropanol (4×30 mL), dried (Na<sub>2</sub>SO<sub>4</sub>), concentrated and the crude product was purified by column chromatography (hexane/ethyl acetate, 7:3) to give **(S)-4d** (458 mg, 85%) as a colorless oil. [ $\alpha$ ]<sub>D</sub><sup>24</sup> (*c* 1.45, MeOH) = -13.7. ESI+ (*m/z*) = 189.0. <sup>1</sup>H NMR (300 MHz, CDCl<sub>3</sub>):  $\delta$  2.68 (br s, 1H); 3.90 (d, 1H, *J* = 11.7); 3.93 (s, 3H); 4.06 (d, 1H, *J* = 11.7); 4.36 (s, 1H). <sup>13</sup>C NMR (75 MHz, CDCl<sub>3</sub>):  $\delta$  54.5; 62.2 (q, <sup>3</sup>*J*<sub>CF</sub> = 1.7); 78.5 (q, <sup>2</sup>*J*<sub>CF</sub> = 28.5); 122.4 (q, <sup>1</sup>*J*<sub>CF</sub> = 284.3); 168.8. <sup>19</sup>F NMR (282 MHz, CDCl<sub>3</sub>):  $\delta$  -75.8 (s). Anal. Calcd. for C<sub>5</sub>H<sub>7</sub>F<sub>3</sub>O<sub>4</sub>: C, 31.93; H, 3.75. Found: C, 32.08; H, 3.80.

\* Enantiomeric excess (ee) of the resulting diols were measured by GC-MS using a chiral capilar column ( $\beta$ -DEX<sup>TM</sup>) as stationary phase, and obtained cromatograms are shown in other section (page S31).

**Methyl (S)-5-(methoxymethylcarbamoyl)-5-(trifluoromethyl)-2,2-dioxo-2λ<sup>6</sup>-[1,2,3]oxathiazolidine-3-carboxylate [(S)-5]**

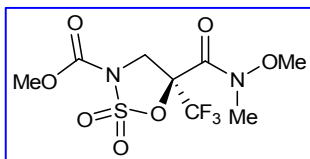

Diol (S)-4c (168 mg, 0.77 mmol) was dissolved in THF (60 mL) and Burgess reagent (461 mg, 1.93 mmol) was added. The resulting solution was stirred at reflux for 1 h, concentrated and then purified by column chromatography (hexane/ethyl acetate, 7:3) to give (S)-5 (132 mg, 51%) as a colorless oil.  $[\alpha]_D^{24}$  (c 1.41, MeOH) = +6.8. ESI+ ( $m/z$ ) = 337.3.  $^1\text{H NMR}$  (400 MHz,  $\text{CDCl}_3$ ):  $\delta$  3.31 (s, 3H); 3.78 (s, 3H); 3.94 (s, 3H); 4.38 (d, 1H,  $J$  = 11.6); 4.78 (d, 1H,  $J$  = 11.0).  $^{13}\text{C NMR}$  (100 MHz,  $\text{CDCl}_3$ ):  $\delta$  33.8; 44.0; 55.2; 61.9; 81.2 (q,  $^2J_{\text{CF}}$  = 33.3); 121.2 (q,  $^1J_{\text{CF}}$  = 284.7); 149.2; 160.1.  $^{19}\text{F NMR}$  (282 MHz,  $\text{CDCl}_3$ ):  $\delta$  -76.2 (s). Anal. Calcd. for  $\text{C}_8\text{H}_{11}\text{F}_3\text{N}_2\text{O}_7\text{S}$ : C, 28.58; H, 3.30; N, 8.33; S, 9.54. Found: C, 28.33; H, 3.21; N, 8.49; S, 9.78.

**(S)-3-Amino-2-(trifluoromethyl)-2-hydroxypropanoic acid hydrochloride or (S)-2-(trifluoromethyl)isoserine hydrochloride [(S)-1·HCl]**

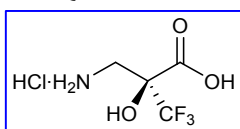

Sulfamidate (S)-5 (63 mg, 0.19 mmol) was treated with an aqueous solution of 6N HCl (2 mL) at reflux for 12 h. The solvent was removed to give (S)-1 as hydrochloride derivative (white solid). The *N,O*-dimethylhydroxylamine hydrochloride formed in the reaction was removed by suspending and filtrating the mixture in absolute ethanol. Further purification was achieved eluting the resulting mixture through a  $\text{C}_{18}$  reverse-phase Sep-pak cartridge with water and evaporating the solvent (36 mg, 90%).  $[\alpha]_D^{24}$  (c 0.95,  $\text{H}_2\text{O}$ ) = -16.8. ESI+ ( $m/z$ ) = 174.2.  $^1\text{H NMR}$  (300 MHz,  $\text{D}_2\text{O}$ ):  $\delta$  3.36-3.54 (m, 2H).  $^{13}\text{C NMR}$  (75 MHz,  $\text{D}_2\text{O}$ ):  $\delta$  42.1; 76.3 (q,  $^2J_{\text{CF}}$  = 29.6); 124.3 (q,  $^1J_{\text{CF}}$  = 284.6); 169.7.  $^{19}\text{F NMR}$  (282 MHz,  $\text{D}_2\text{O}$ ):  $\delta$  -75.4 (s).

**(S)-4-(Trifluoromethyl)-2,2-dioxo-2λ<sup>6</sup>-[1,3,2]dioxathiolane-4-carboxylic acid N-methoxy-N-methylamide [(S)-6c]**

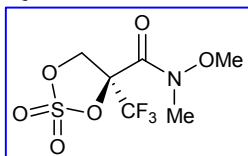

Diol (S)-4c (610 mg, 2.81 mmol) was dissolved in  $\text{CH}_2\text{Cl}_2$  (20 mL), and TEA (1.7 mL, 12.36 mmol) and  $\text{SO}_2\text{Cl}_2$  (0.47 mL, 5.61 mmol) were added dropwise at -20 °C. The resulting solution was stirred for 1 h, concentrated and then purified by column chromatography (hexane/ethyl acetate, 4:1) to give (S)-6c (637 mg, 81%) as a colorless liquid.  $[\alpha]_D^{24}$  (c 1.12,  $\text{CHCl}_3$ ) = -17.0. ESI+ ( $m/z$ ) = 280.0.  $^1\text{H NMR}$  (300 MHz,  $\text{CDCl}_3$ ):  $\delta$  3.31

(s, 3H); 3.79 (s, 3H); 4.96 (d, 1H,  $J$  = 10.4); 5.13 (d, 1H,  $J$  = 10.4).  $^{13}\text{C NMR}$  (100 MHz,  $\text{CDCl}_3$ ):  $\delta$  33.5; 62.2; 70.1; 84.0 (q,  $^2J_{\text{CF}}$  = 33.8); 121.1 (q,  $^1J_{\text{CF}}$  = 284.7); 160.2.  $^{19}\text{F NMR}$  (282 MHz,  $\text{CDCl}_3$ ):  $\delta$  -76.6 (s). Anal. Calcd. for  $\text{C}_6\text{H}_8\text{F}_3\text{NO}_6\text{S}$ : C, 25.81; H, 2.89; N, 5.02; S, 11.48. Found: C, 25.68; H, 2.98; N, 5.09; S, 11.36.

**Methyl (S)-4-(trifluoromethyl)-2,2-dioxo-2λ<sup>6</sup>-[1,3,2]dioxathiolane-4-carboxylate [(S)-6d]**

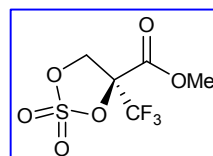

Diol (S)-4c (225 mg, 1.20 mmol) was dissolved in  $\text{CH}_2\text{Cl}_2$  (15 mL) and DIEA (0.75 mL, 5.96 mmol) and  $\text{SO}_2\text{Cl}_2$  (0.20 mL, 2.39 mmol) were added dropwise at -20 °C. The resulting solution was stirred for 1 h, concentrated and then purified by column chromatography (hexane/ethyl acetate, 4:1) to give (S)-6d (234 mg, 78%) as a colorless liquid.  $[\alpha]_D^{24}$  (c 1.84,  $\text{CHCl}_3$ ) = -0.9. ESI+ ( $m/z$ ) = 251.2.  $^1\text{H NMR}$  (400 MHz,  $\text{CDCl}_3$ ):  $\delta$  4.00 (s, 3H); 4.95 (d, 1H,  $J$  = 10.2); 5.04 (d, 1H,  $J$  = 10.2).  $^{13}\text{C NMR}$  (100 MHz,  $\text{CDCl}_3$ ):  $\delta$  55.1; 68.8 (q,  $^3J_{\text{CF}}$  = 1.6); 82.2 (q,  $^2J_{\text{CF}}$  = 34.0); 120.5 (q,  $^1J_{\text{CF}}$  = 283.6); 161.9.  $^{19}\text{F NMR}$  (282 MHz,  $\text{CDCl}_3$ ):  $\delta$  -77.4 (s). Anal. Calcd. for  $\text{C}_5\text{H}_5\text{F}_3\text{O}_6\text{S}$ : C, 24.01; H, 2.01; S, 12.82. Found: C, 24.16; H, 1.97; S, 12.73.

**(S)-3-Azido-2-(trifluoromethyl)-2-hydroxy-N-methoxy-N-methylpropanamide [(S)-7c]**

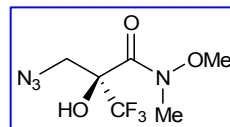

Compound (S)-6c (560 mg, 2.00 mmol) and  $\text{NaN}_3$  (391 mg, 6.02 mmol) were heated in DMF (10 mL) at 70 °C for 12 h, when consumption of sulfite was observed by GC/MS. The solution was then cooled, concentrated and the residue was partitioned between  $\text{H}_2\text{SO}_4$  20% (10 mL) and  $\text{CH}_2\text{Cl}_2$  (20 mL). The aqueous layer was successively extracted with  $\text{CH}_2\text{Cl}_2$  (2×20 mL), dried over  $\text{Na}_2\text{SO}_4$ , concentrated and the crude product chromatographed (hexane/ethyl acetate, 9:1) to give the  $\beta$ -azido- $\alpha$ -alcohol (S)-7c (480 mg, 99%) as a colorless liquid.  $[\alpha]_D^{24}$  (c 1.9,  $\text{CHCl}_3$ ) = -73.8. ESI+ ( $m/z$ ) = 243.2.  $^1\text{H NMR}$  (400 MHz,  $\text{CDCl}_3$ ):  $\delta$  3.35 (s, 3H); 3.72 (d, 1H,  $J$  = 12.6); 3.73 (s, 3H); 3.86 (d, 1H,  $J$  = 12.6); 5.28 (s, 1H).  $^{13}\text{C NMR}$  (100 MHz,  $\text{CDCl}_3$ ):  $\delta$  34.0; 51.6; 61.0; 79.0 (q,  $^2J_{\text{CF}}$  = 29.1); 122.5 (q,  $^1J_{\text{CF}}$  = 284.8); 165.0.  $^{19}\text{F NMR}$  (282 MHz,  $\text{CDCl}_3$ ):  $\delta$  -76.0 (s). Anal. Calcd. for  $\text{C}_6\text{H}_9\text{F}_3\text{N}_4\text{O}_3$ : C, 29.76; H, 3.75; N, 23.14. Found: C, 29.92; H, 3.65; N, 23.34.

**(*S*)-Methyl 3-azido-2-(trifluoromethyl)-2-hydroxypropanoate [(*S*)-7d]**

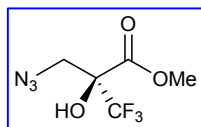

Compound (*S*)-**6d** (160 mg, 0.64 mmol) and NaN<sub>3</sub> (125 mg, 1.92 mmol) were heated in DMF (5 mL) at 70 °C for 12 h, when consumption of sulfite was observed by GC/MS. The solution was then cooled, concentrated and the residue was partitioned between H<sub>2</sub>SO<sub>4</sub> 20% (10 mL) and CH<sub>2</sub>Cl<sub>2</sub> (20 mL). The aqueous layer was successively extracted with CH<sub>2</sub>Cl<sub>2</sub> (2×15 mL), dried over Na<sub>2</sub>SO<sub>4</sub>, concentrated and the crude product chromatographed (hexane/ethyl acetate, 9:1) to give the β-azido-α-alcohol (*S*)-**7d** (123 mg, 90%) as a colorless liquid.  $[\alpha]_D^{24}$  (*c* 1.0, CHCl<sub>3</sub>) = -48.5. ESI+ (*m/z*) = 214.1. <sup>1</sup>H NMR (400 MHz, CDCl<sub>3</sub>): δ 3.64 (d, 1H, *J* = 12.8); 3.73 (d, 1H, *J* = 12.8); 3.96 (s, 3H); 4.15 (s, 1H). <sup>13</sup>C NMR (100 MHz, CDCl<sub>3</sub>): δ 51.7; 54.8; 78.2 (q, <sup>2</sup>*J*<sub>CF</sub> = 29.2); 122.2 (q, <sup>1</sup>*J*<sub>CF</sub> = 285.0); 168.1. <sup>19</sup>F NMR (282 MHz, CDCl<sub>3</sub>): δ -75.9 (s). Anal. Calcd. for C<sub>5</sub>H<sub>6</sub>F<sub>3</sub>N<sub>3</sub>O<sub>3</sub>: C, 28.18; H, 2.84; N, 19.72. Found: C, 28.31; H, 2.99; N, 19.56.

**(*S*)-3-Amino-2-(trifluoromethyl)-2-hydroxypropanoic acid or (*S*)-2-(trifluoromethyl)isoserine [(*S*)-1]**

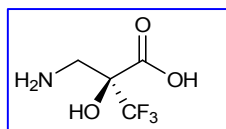

**Method A:** To a solution of compound (*S*)-**7c** (128 mg, 0.53 mmol) in H<sub>2</sub>O/MeOH (1:3, 10 mL) was added LiOH·H<sub>2</sub>O (111 mg, 2.64 mmol) with the resulting mixture stirred at 25 °C for 2 h. The *N,O*-dimethylhydroxylamine formed in the reaction along with MeOH was removed and the mixture acidified with conc. HCl to pH 1–2. The solvent was removed and the residue partitioned between H<sub>2</sub>O (10 mL) and ethyl acetate (20 mL). The aqueous layer was successively extracted with ethyl acetate (2×20 mL), dried over Na<sub>2</sub>SO<sub>4</sub> and concentrated. The obtained acid was dissolved in MeOH (5 mL) after which palladium on carbon (1:5, catalyst/substrate by weight) was added. The resulting suspension was stirred at 25 °C for 48 h. Then, H<sub>2</sub>O (5 mL) was added, the catalyst was removed by filtration and the solvent evaporated to give the corresponding amino acid (*S*)-**1** (87 mg, 95%) as a white solid.

**Method B:** Compound (*S*)-**7d** (67 mg, 0.31 mmol) was treated with an aqueous solution of 6N HCl (5 mL) at 60 °C for 12 h. The solvent was removed and the residue partitioned between H<sub>2</sub>O (10 mL) and ethyl acetate (20 mL). The aqueous layer was

successively extracted with ethyl acetate (2×20 mL), dried over Na<sub>2</sub>SO<sub>4</sub> and concentrated. The acid obtained was dissolved in methanol (5 mL) after which palladium on carbon (1:5, catalyst/substrate by weight) was added. The resulting suspension was stirred at 25 °C for 48 h. Then, H<sub>2</sub>O (5 mL) was added, the catalyst was removed by filtration and the solvent evaporated to give the corresponding amino acid (*S*)-**1** (47 mg, 87%) as a white solid.  $[\alpha]_D^{24}$  (*c* 1.0, H<sub>2</sub>O) = -24.1. ESI+ (*m/z*) = 174.2. <sup>1</sup>H NMR (400 MHz, D<sub>2</sub>O): δ 3.39–3.51 (m, 2H); <sup>13</sup>C NMR (100 MHz, D<sub>2</sub>O): δ 40.8; 74.8 (q, <sup>2</sup>*J*<sub>CF</sub> = 28.0); 123.7 (q, <sup>1</sup>*J*<sub>CF</sub> = 283.3); 169.9. <sup>19</sup>F NMR (282 MHz, D<sub>2</sub>O): δ -75.4 (s). Anal. Calcd. for C<sub>4</sub>H<sub>6</sub>F<sub>3</sub>N<sub>3</sub>O<sub>3</sub>: C, 27.76; H, 3.49; N, 8.09. Found: C, 27.89; H, 3.57; N, 7.98.

**(*S*)-*N*-(Tosyl)phenylalaninyl (*S*)-2-(trifluoromethyl)isoserine methyl ester [(*S,S*)-8]**

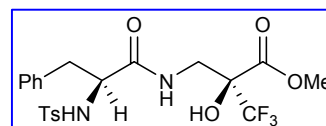

Amino acid (*S*)-**1** (48 mg, 0.28 mmol) was dissolved in HCl/MeOH, prepared by dropwise addition of AcCl (4 mL) to MeOH (16 mL) at 0 °C, and the mixture was heated under reflux for 10 h. The solvent was evaporated and the resulting hydrochloride was exhaustively dried before being suspended in CH<sub>2</sub>Cl<sub>2</sub> (10 mL) under an argon atmosphere. *N*-(tosyl)phenylalaninyl chloride (124 mg, 0.36 mmol) and DIEA (146 μL, 0.84 mmol) were added and the mixture was stirred at 25 °C for 14 h. The reaction was quenched with 0.5N HCl (2 mL), and the aqueous layer was extracted with ethyl acetate (2×15 mL), dried over Na<sub>2</sub>SO<sub>4</sub>, concentrated, and the crude product chromatographed (hexane/ethyl acetate, 6:4) to give dipeptide (*S,S*)-**8** (120 mg, 88%) as a white solid (mp = 124–126 °C).  $[\alpha]_D^{24}$  (*c* 1.27, CHCl<sub>3</sub>) = -29.0. ESI+ (*m/z*) = 489.5. <sup>1</sup>H NMR (400 MHz, CDCl<sub>3</sub>): δ 2.42 (s, 3H); 2.75 (dd, 1H, *J* = 14.1, *J* = 8.7); 2.99 (dd, 1H, *J* = 14.1, *J* = 5.2); 3.53 (dd, 1H, *J* = 14.0, *J* = 4.9); 3.84 (td, 1H, *J* = 8.6, *J* = 5.7); 3.89 (s, 3H); 4.18 (dd, 1H, *J* = 14.0, *J* = 7.9), 4.71 (br s, 1H); 5.23 (d, 1H, *J* = 6.3); 6.84–6.90 (m, 2H); 7.04 (dd, 1H, *J* = 7.4, *J* = 5.0); 7.09–7.18 (m, 5H); 7.40–7.47 (m, 2H). <sup>13</sup>C NMR (100 MHz, CDCl<sub>3</sub>): δ 21.5; 37.9; 41.3; 54.4; 58.0; 73.3 (q, <sup>2</sup>*J*<sub>CF</sub> = 28.9); 122.6 (q, <sup>1</sup>*J*<sub>CF</sub> = 286.5); 125.3; 126.7; 126.9; 127.2; 128.9; 129.8; 135.1; 143.9; 168.4; 171.8. <sup>19</sup>F NMR (282 MHz, CDCl<sub>3</sub>): δ -77.5 (s). Anal. Calcd. for C<sub>21</sub>H<sub>23</sub>F<sub>3</sub>N<sub>2</sub>O<sub>6</sub>S: C, 51.63; H, 4.75; N, 5.73; S, 6.56. Found: C, 51.39; H, 4.87; N, 5.81; S, 6.45.

$^1\text{H}$  and  $^{13}\text{C}$  NMR spectra for compounds as well as  $^1\text{H}$ - $^1\text{H}$  and  $^1\text{H}$ - $^{13}\text{C}$

correlations for all new compounds

**Benzyl 2-(trifluoromethyl)acrylate (2b)**

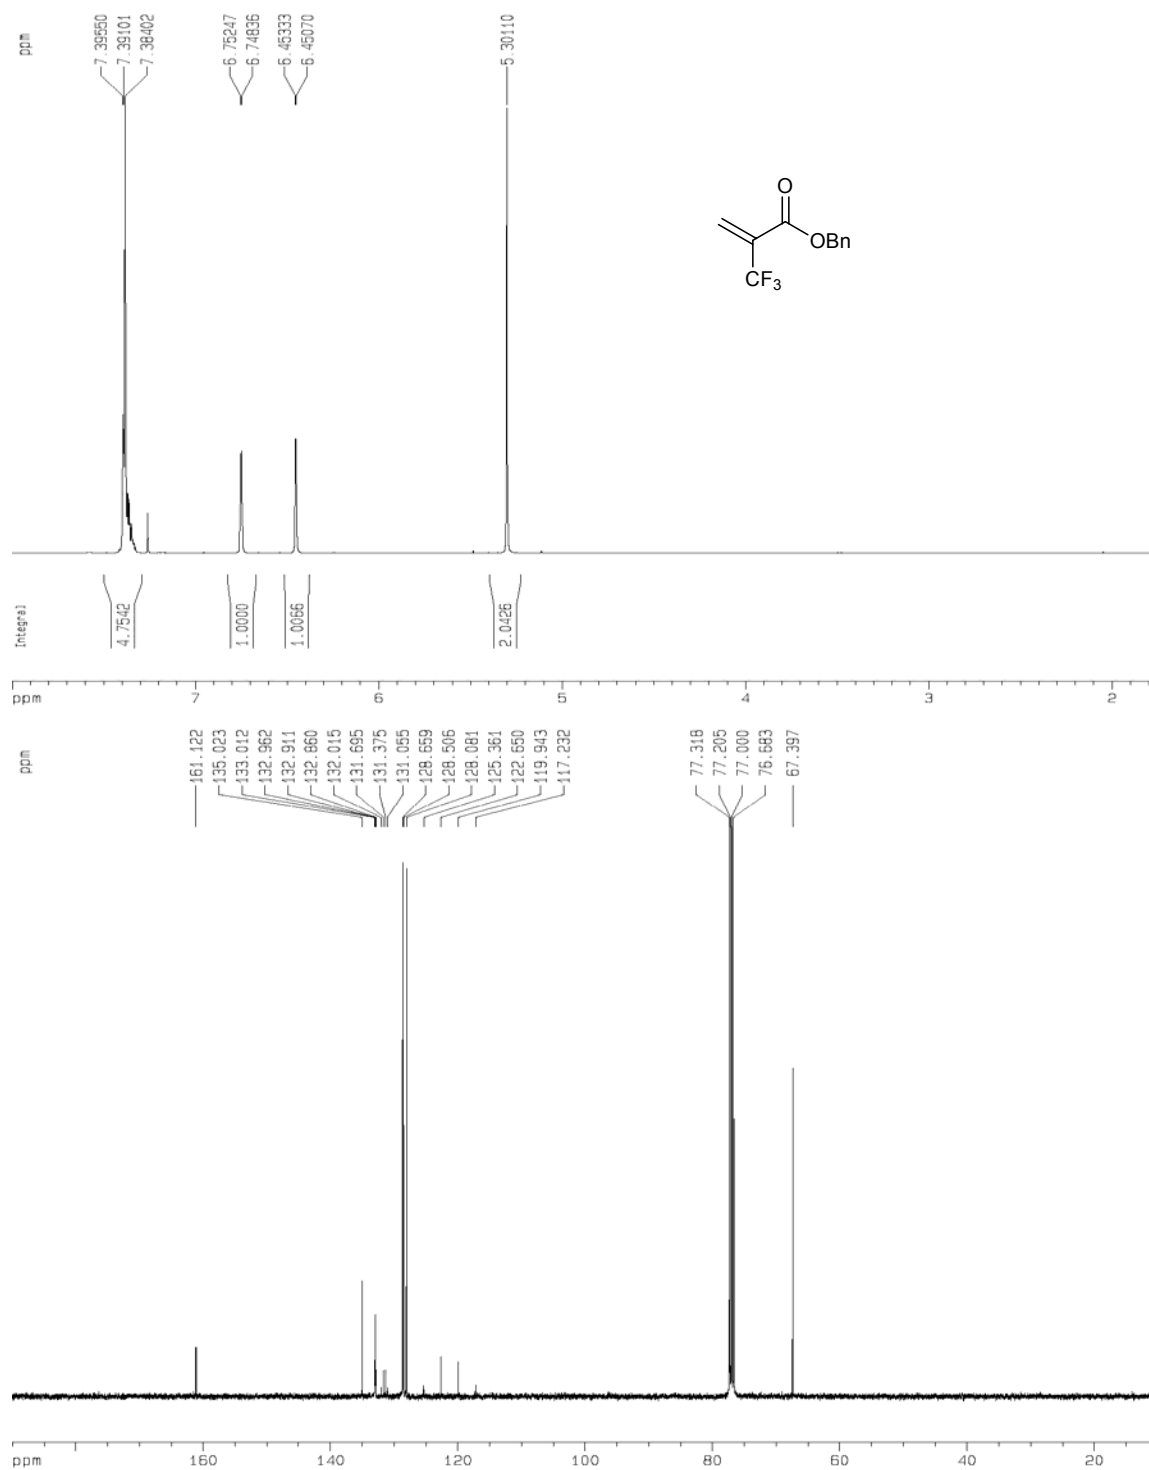

S7

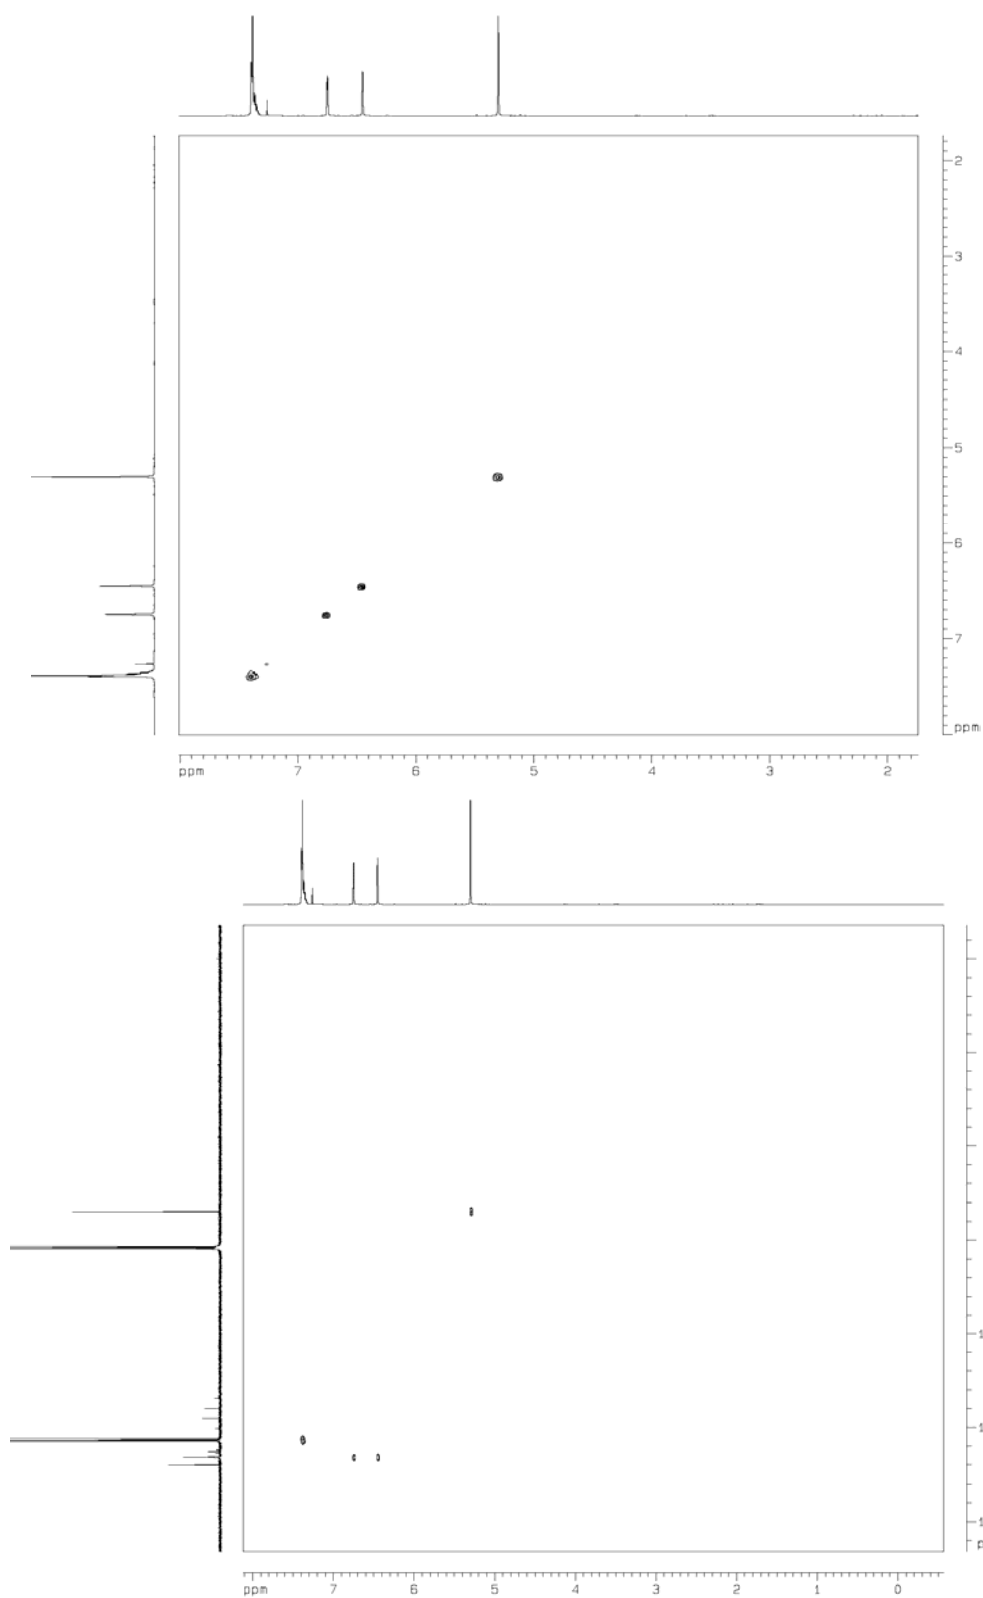

**2-(Trifluoromethyl)-*N*-methoxy-*N*-methylacrylamide (2c)**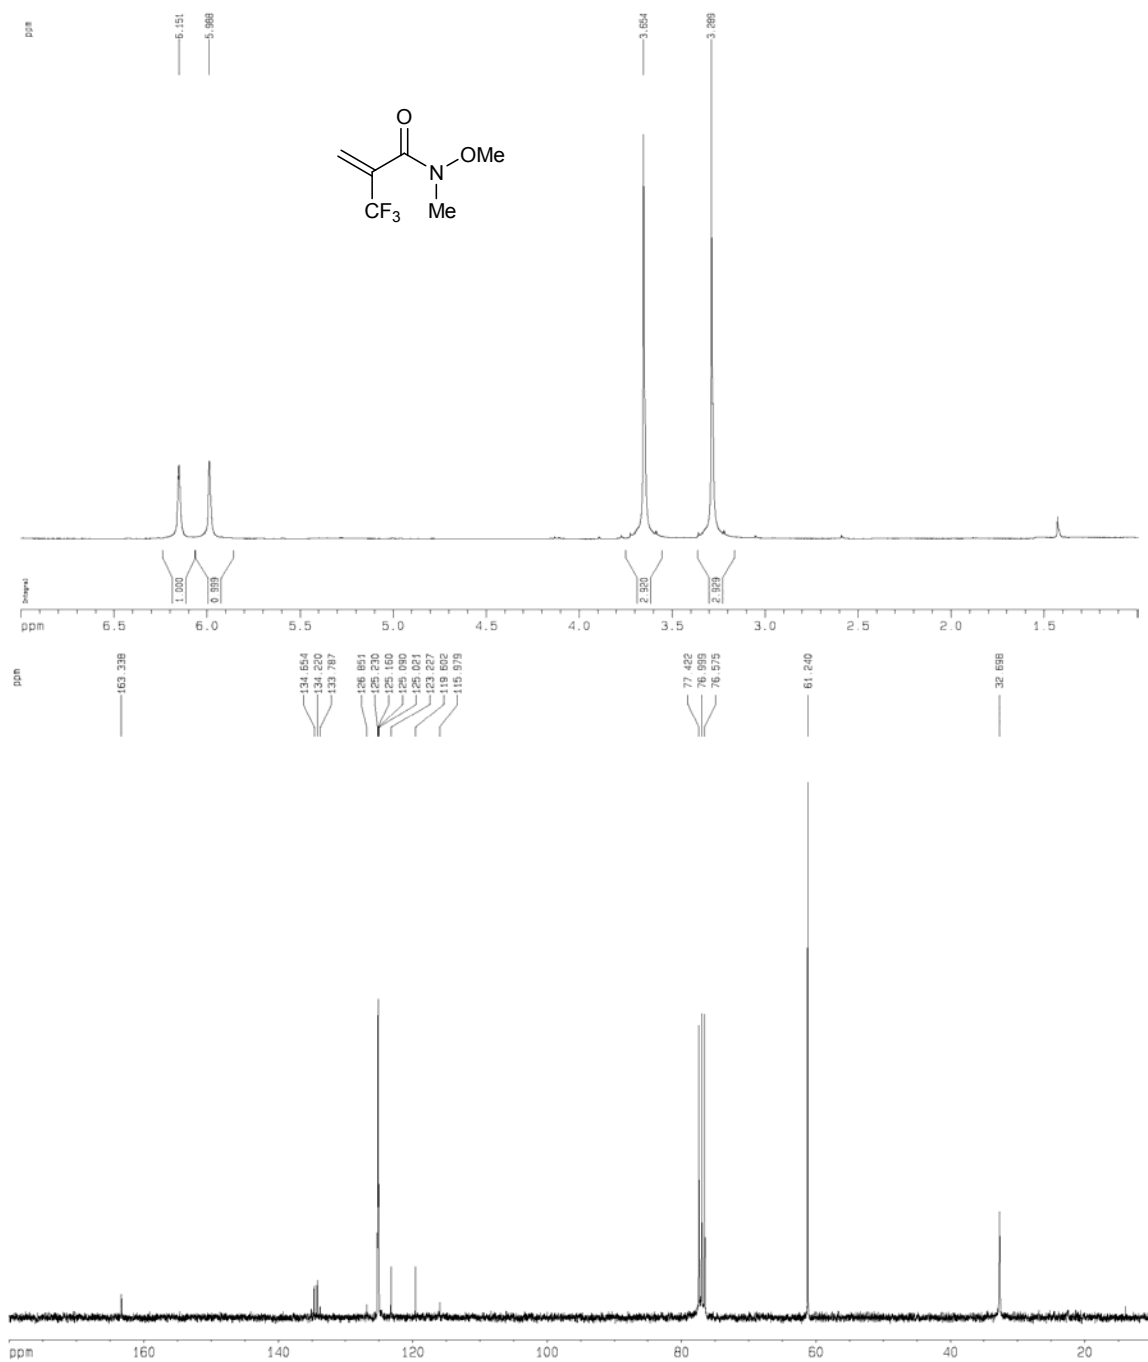



S9

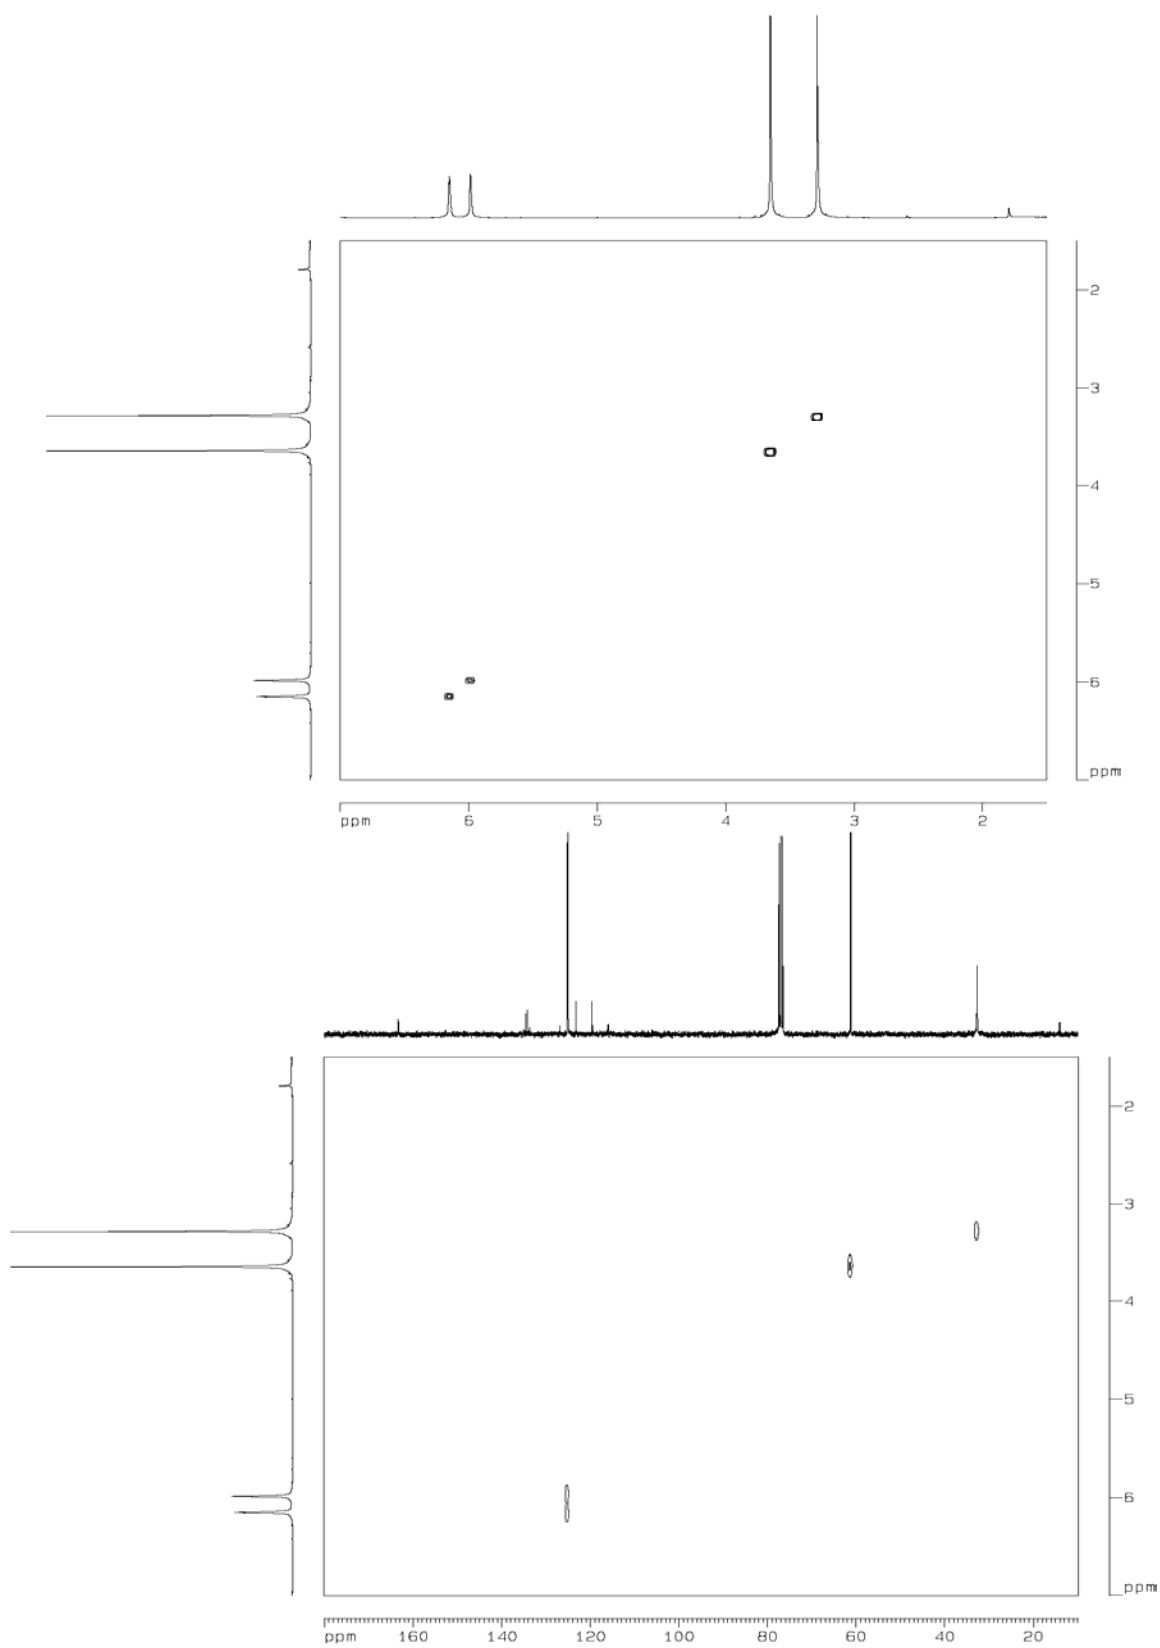

Benzyl (*S*)-2-(trifluoromethyl)-2,3-dihydroxy-propanoate[(*S*)-4b]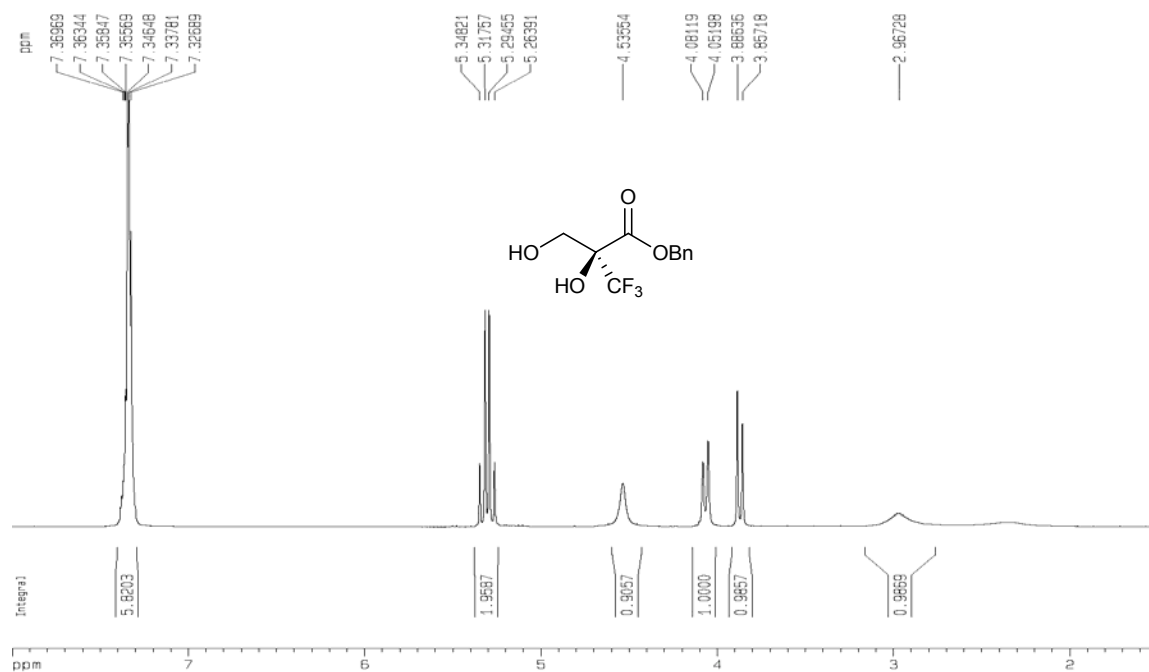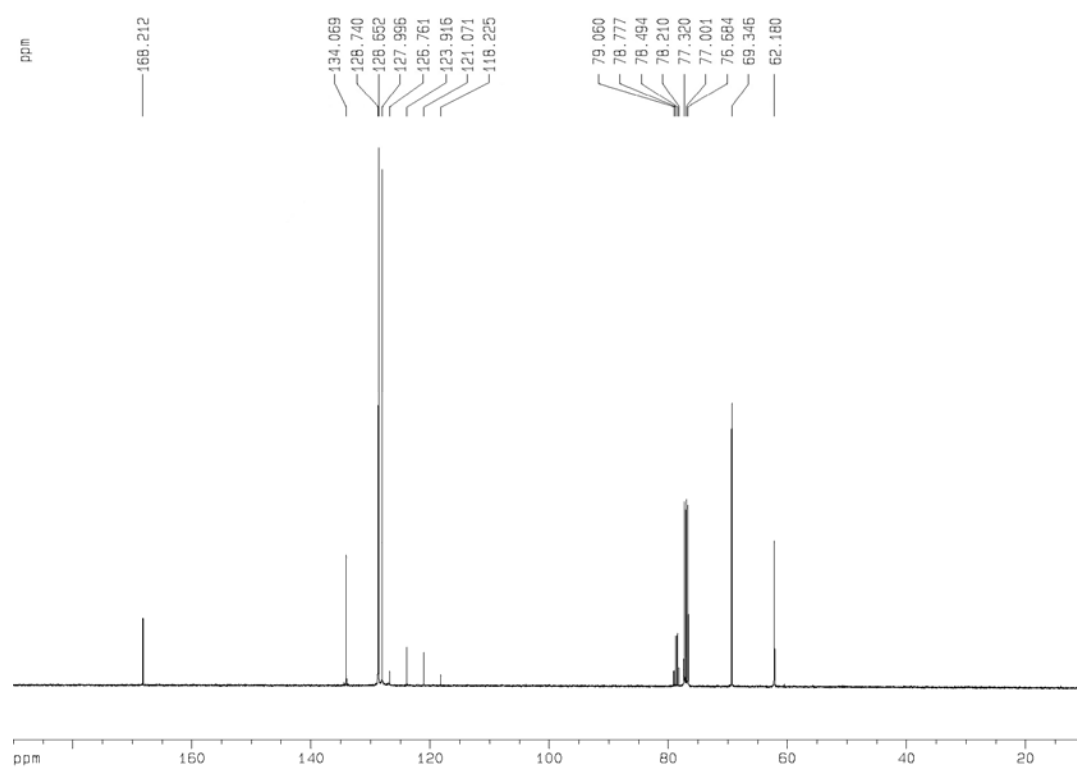

S11

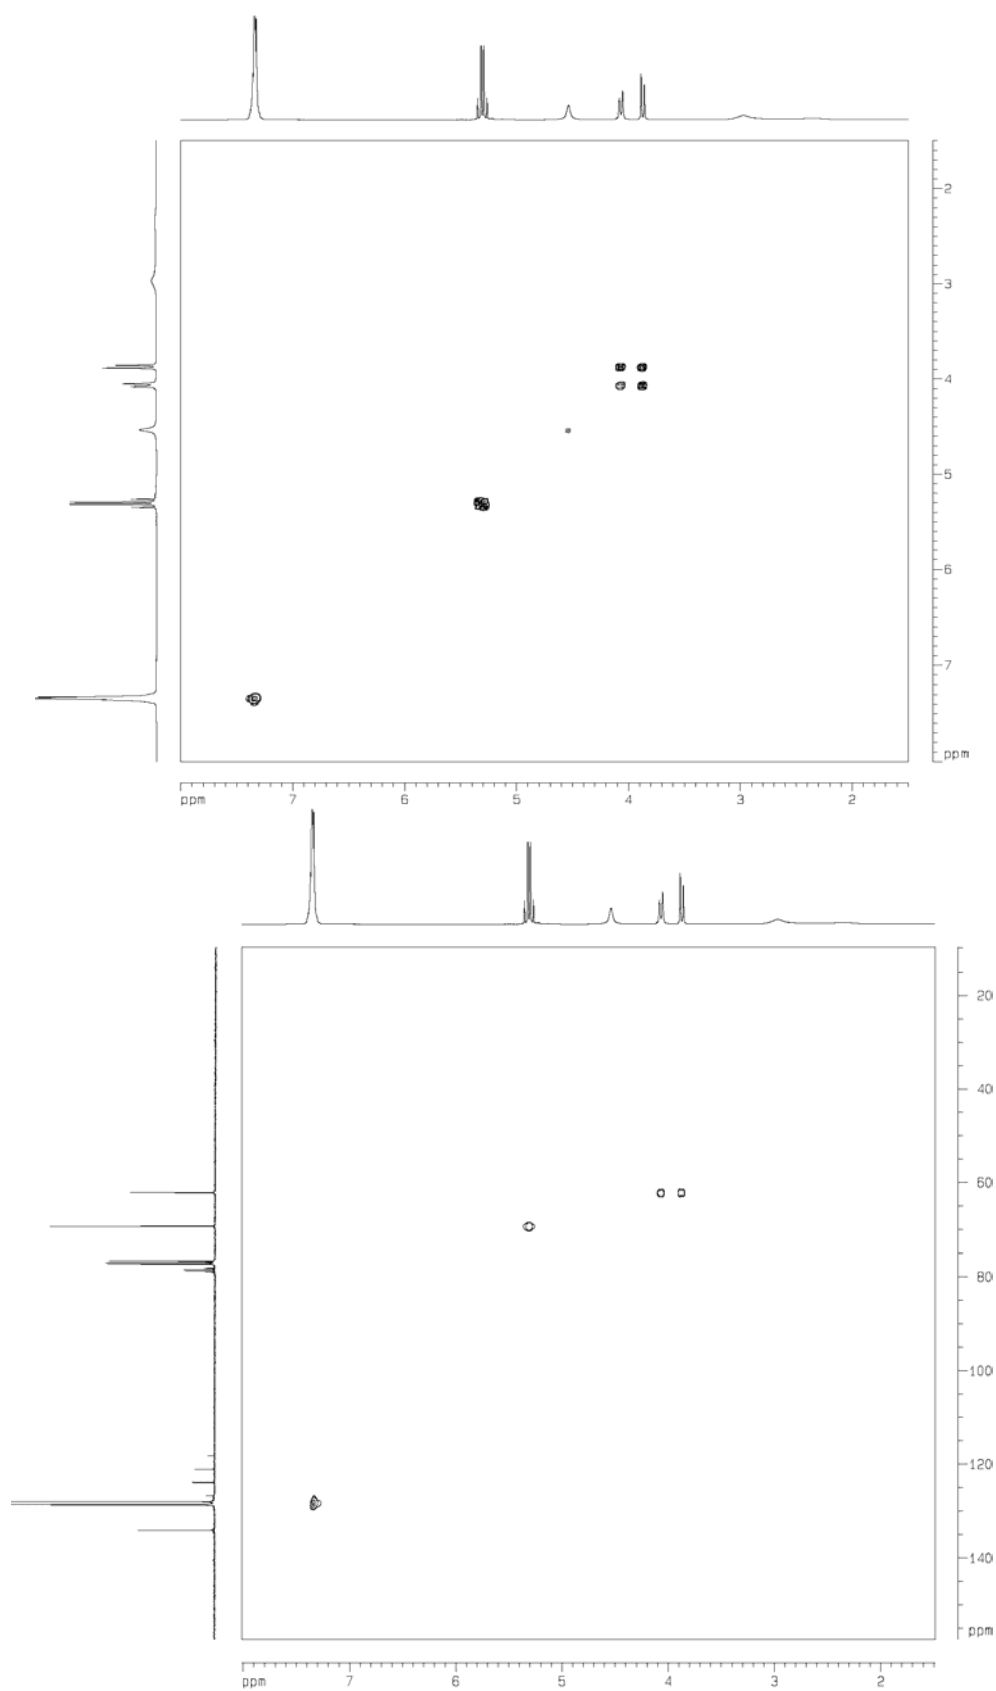

**(S)-2-(Trifluoromethyl)-2,3-dihydroxy-N-methoxy-N-methylpropanamide [(S)-4c]**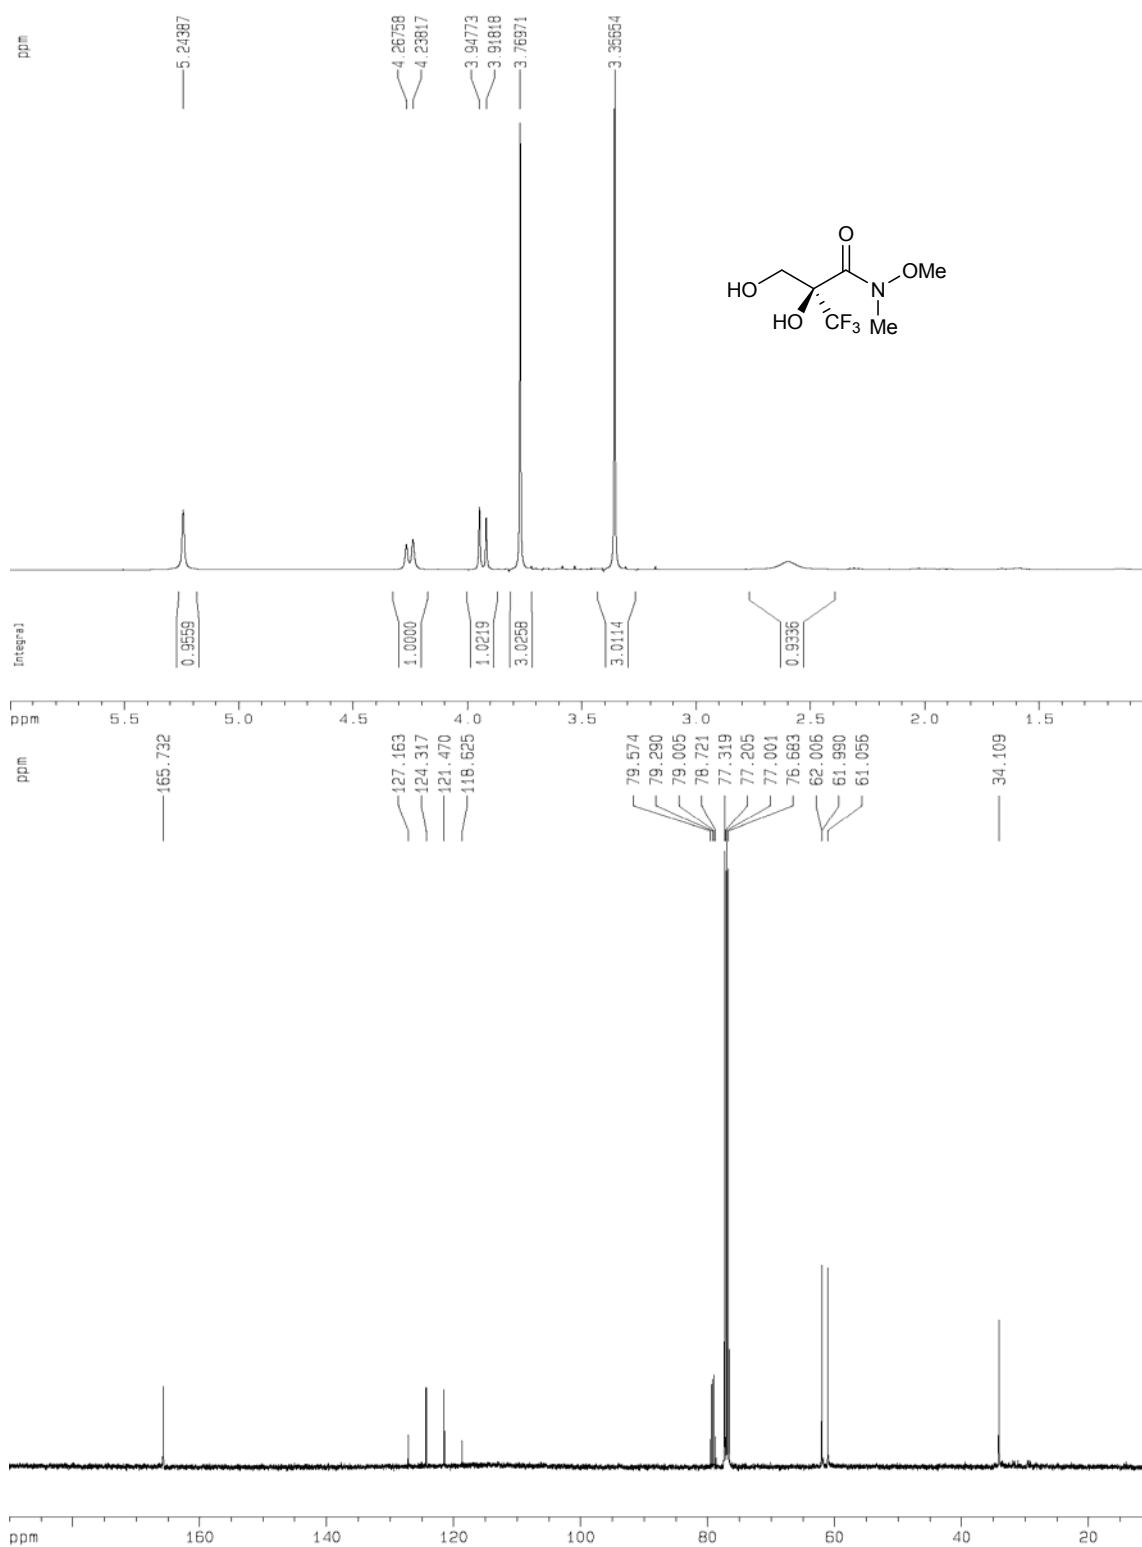

S13

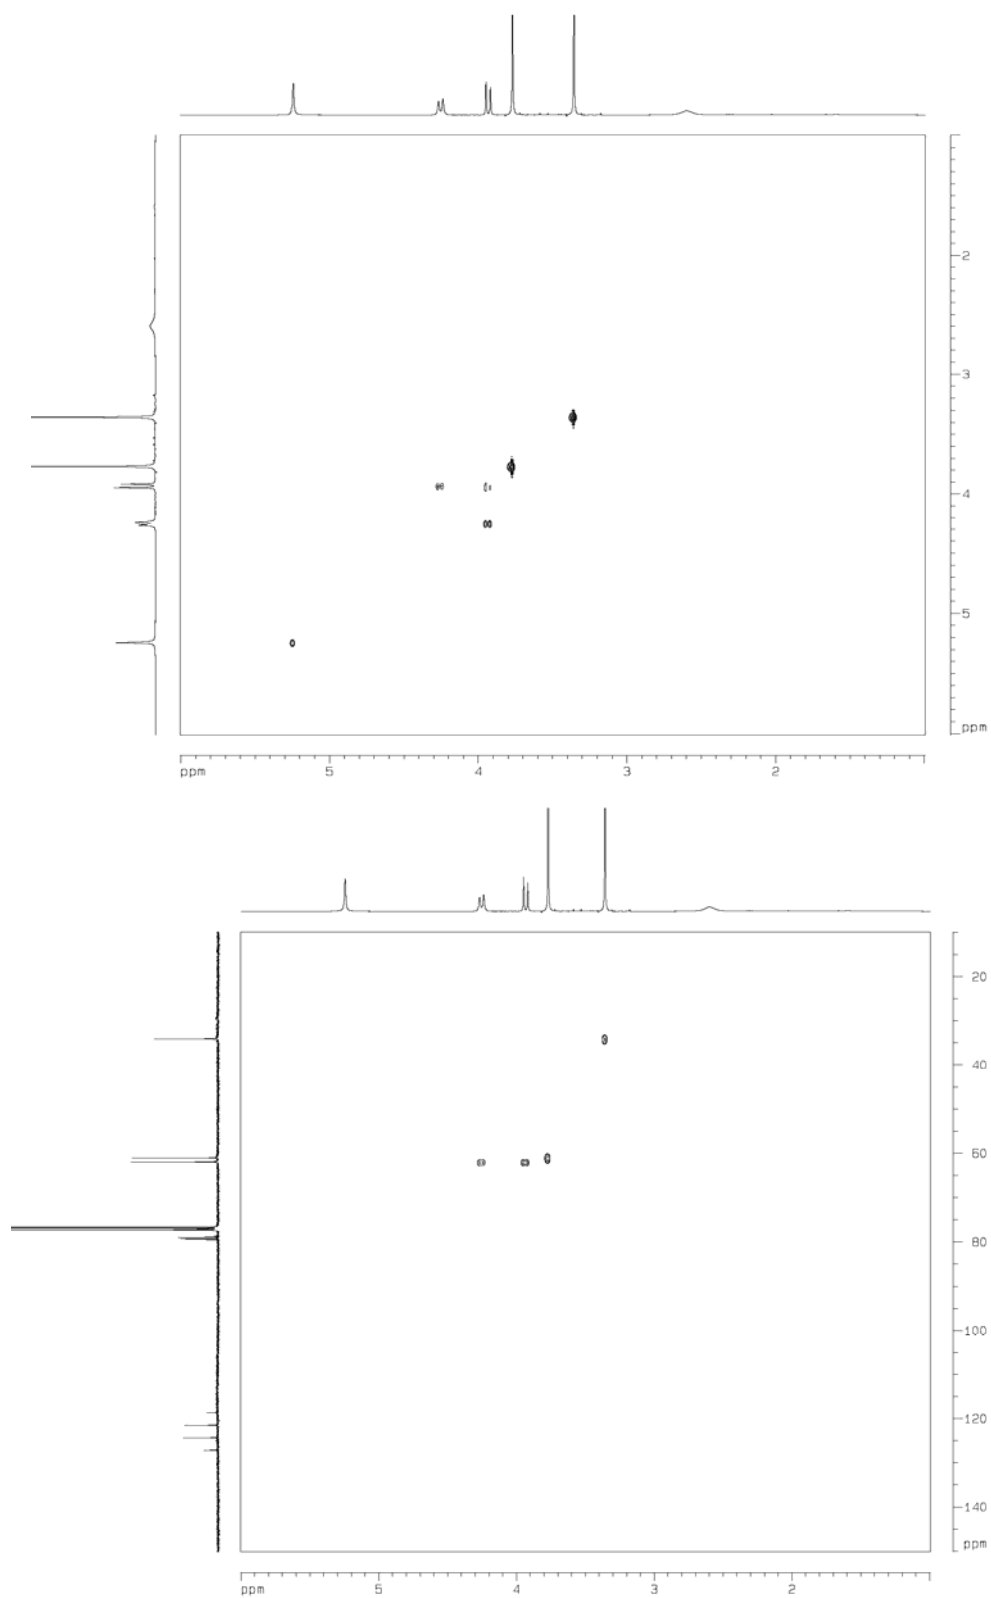

S14

**Methyl (*S*)-2-(trifluoromethyl)-2,3-dihydroxypropanoate [(*S*)-4d]**

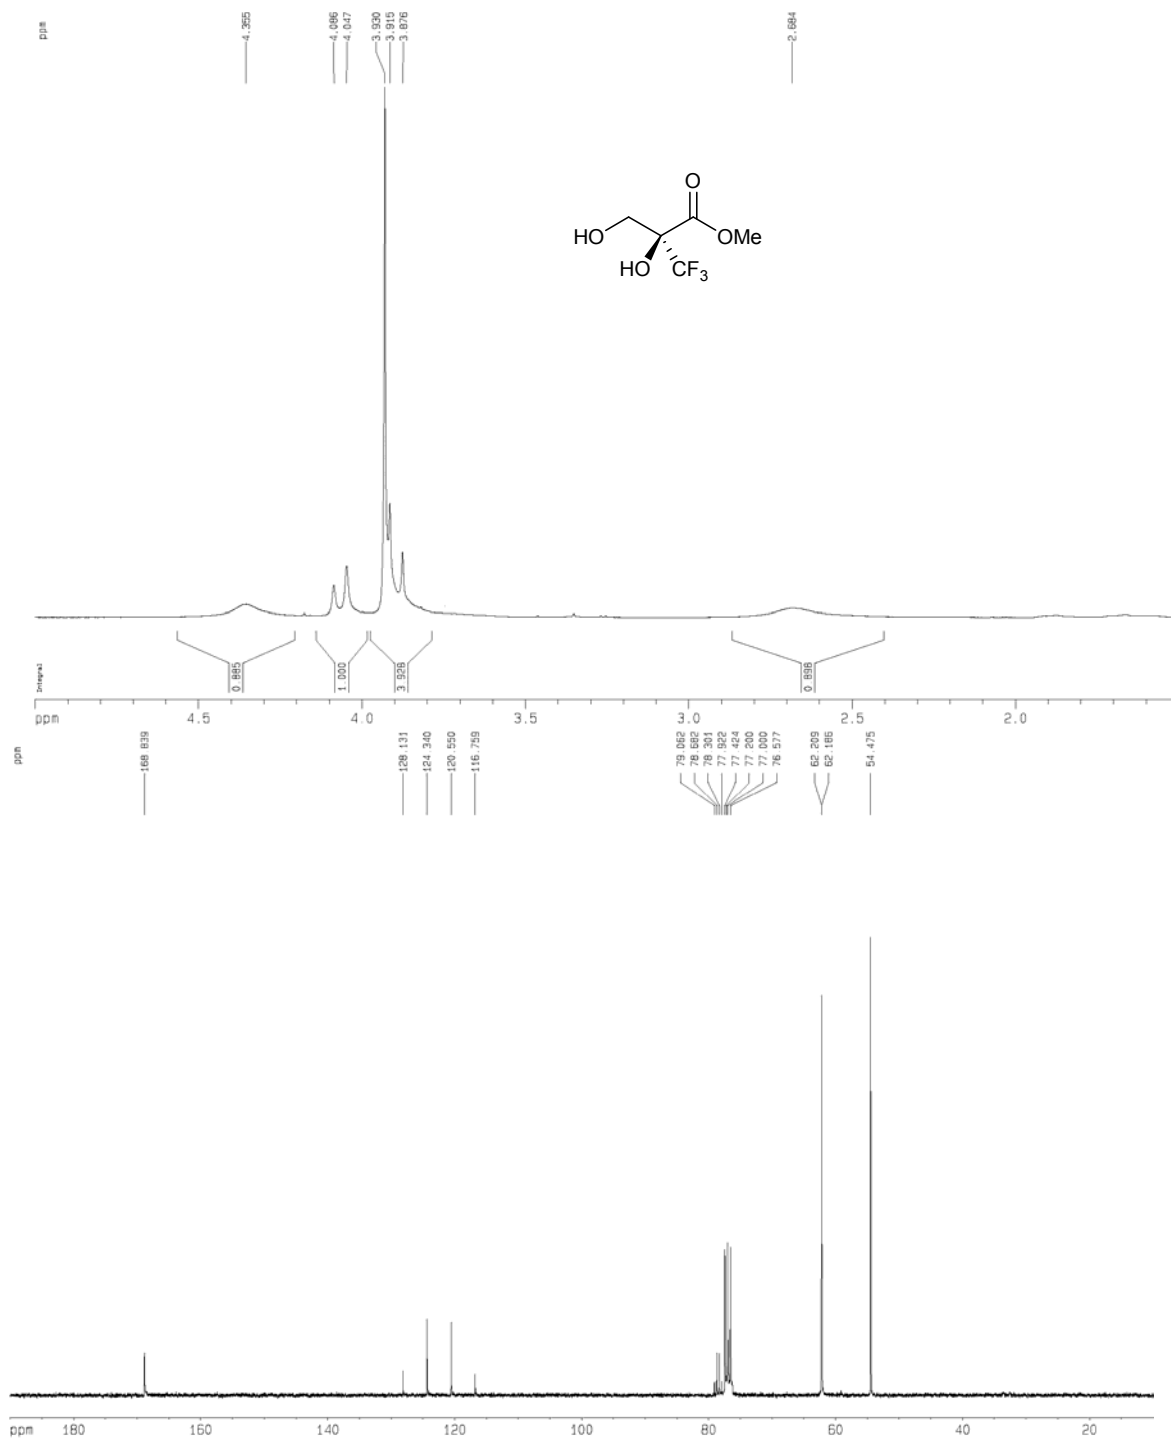

S15

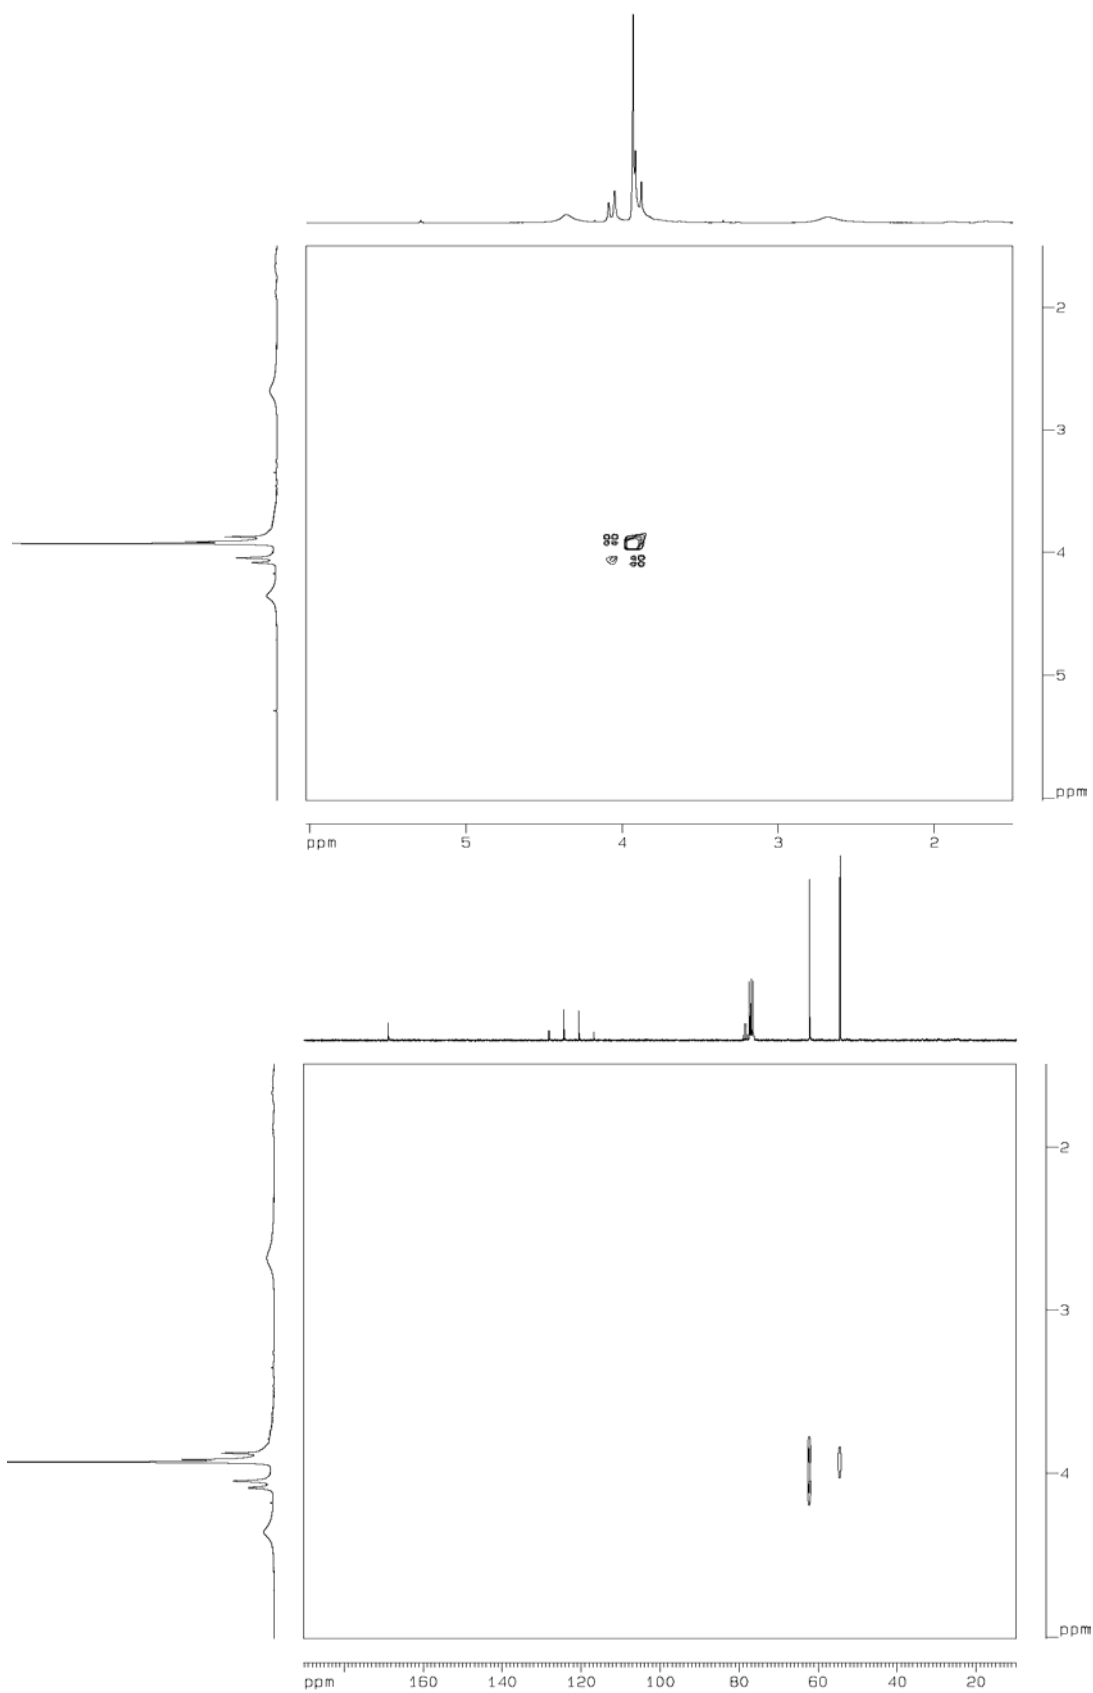

**Methyl (S)-5-(methoxymethylcarbamoyl)-5-(trifluoromethyl)-2,2-dioxo-2λ<sup>6</sup>-[1,2,3]oxathiazolidine-3-carboxylate [(S)-5]**

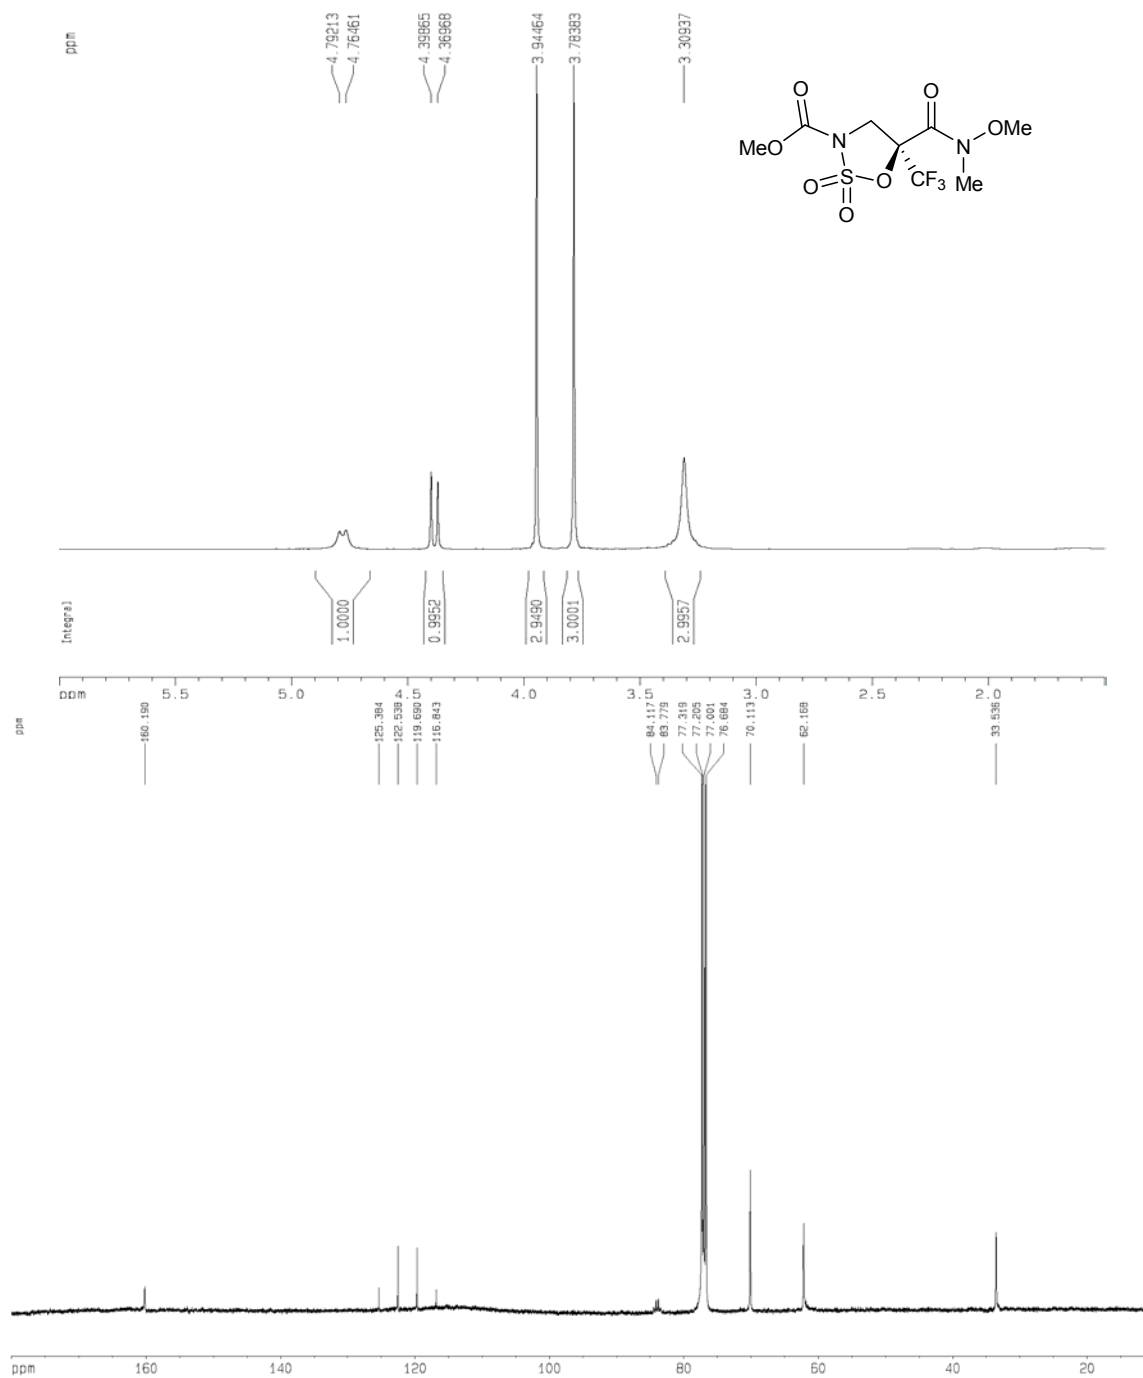



S17

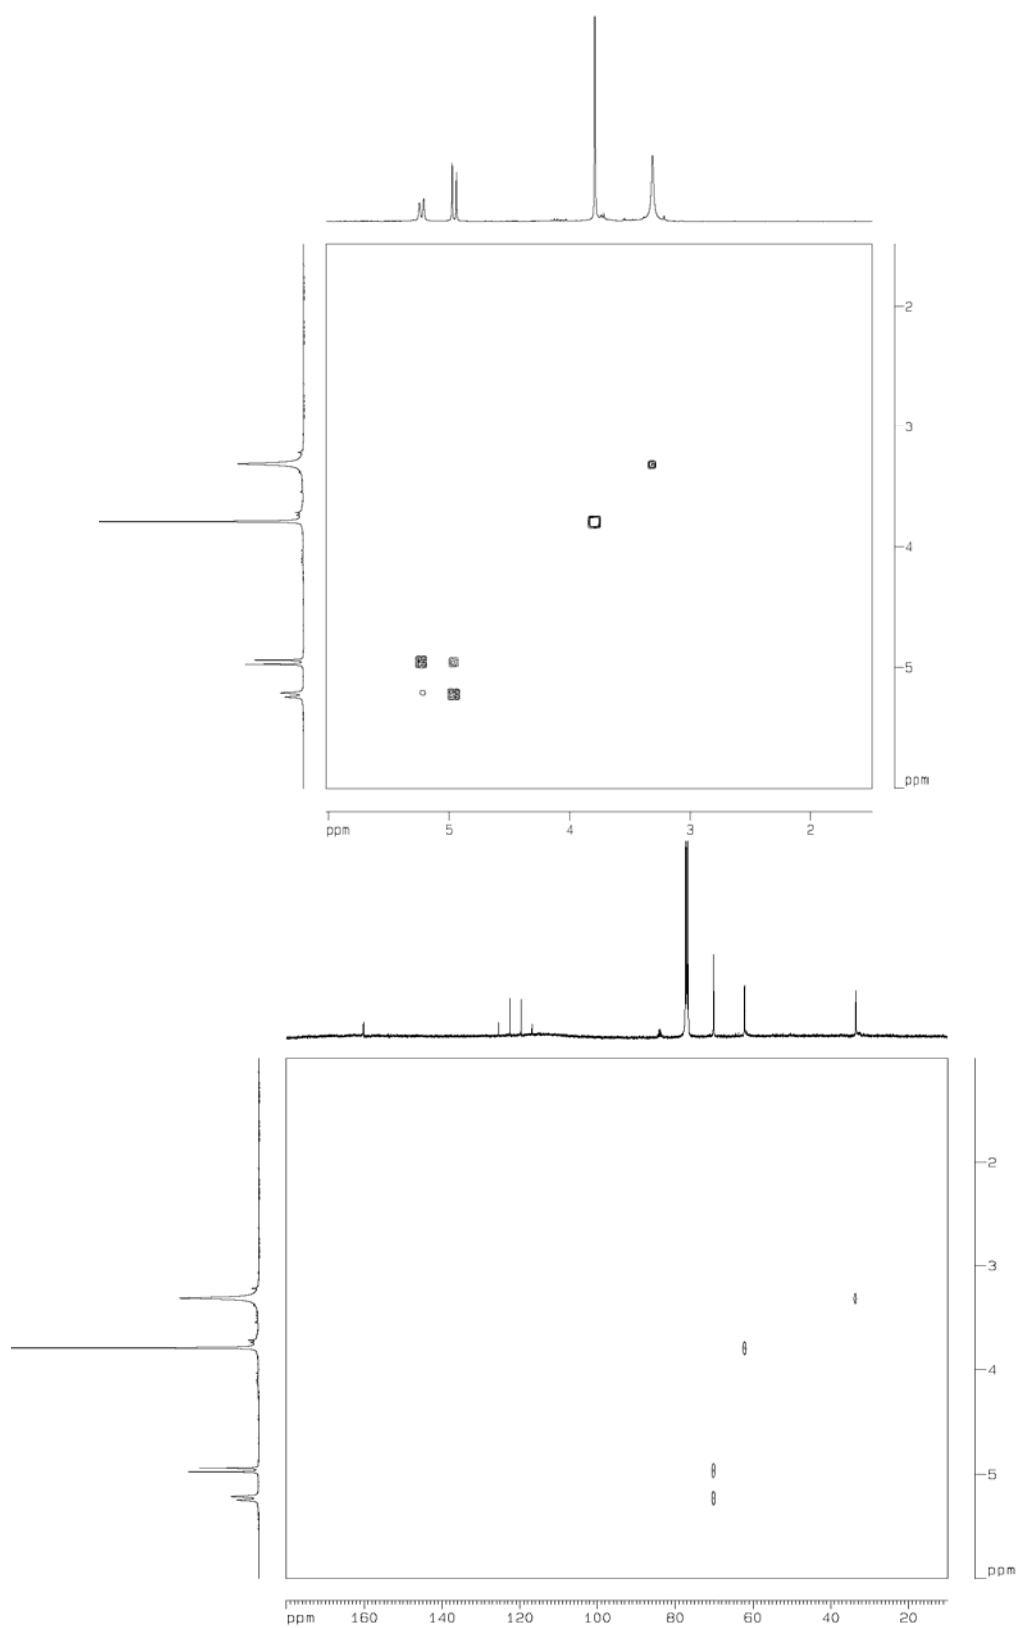

S18

**(S)-2-(Trifluoromethyl)isoserine hydrochloride [(S)-1-HCl]**

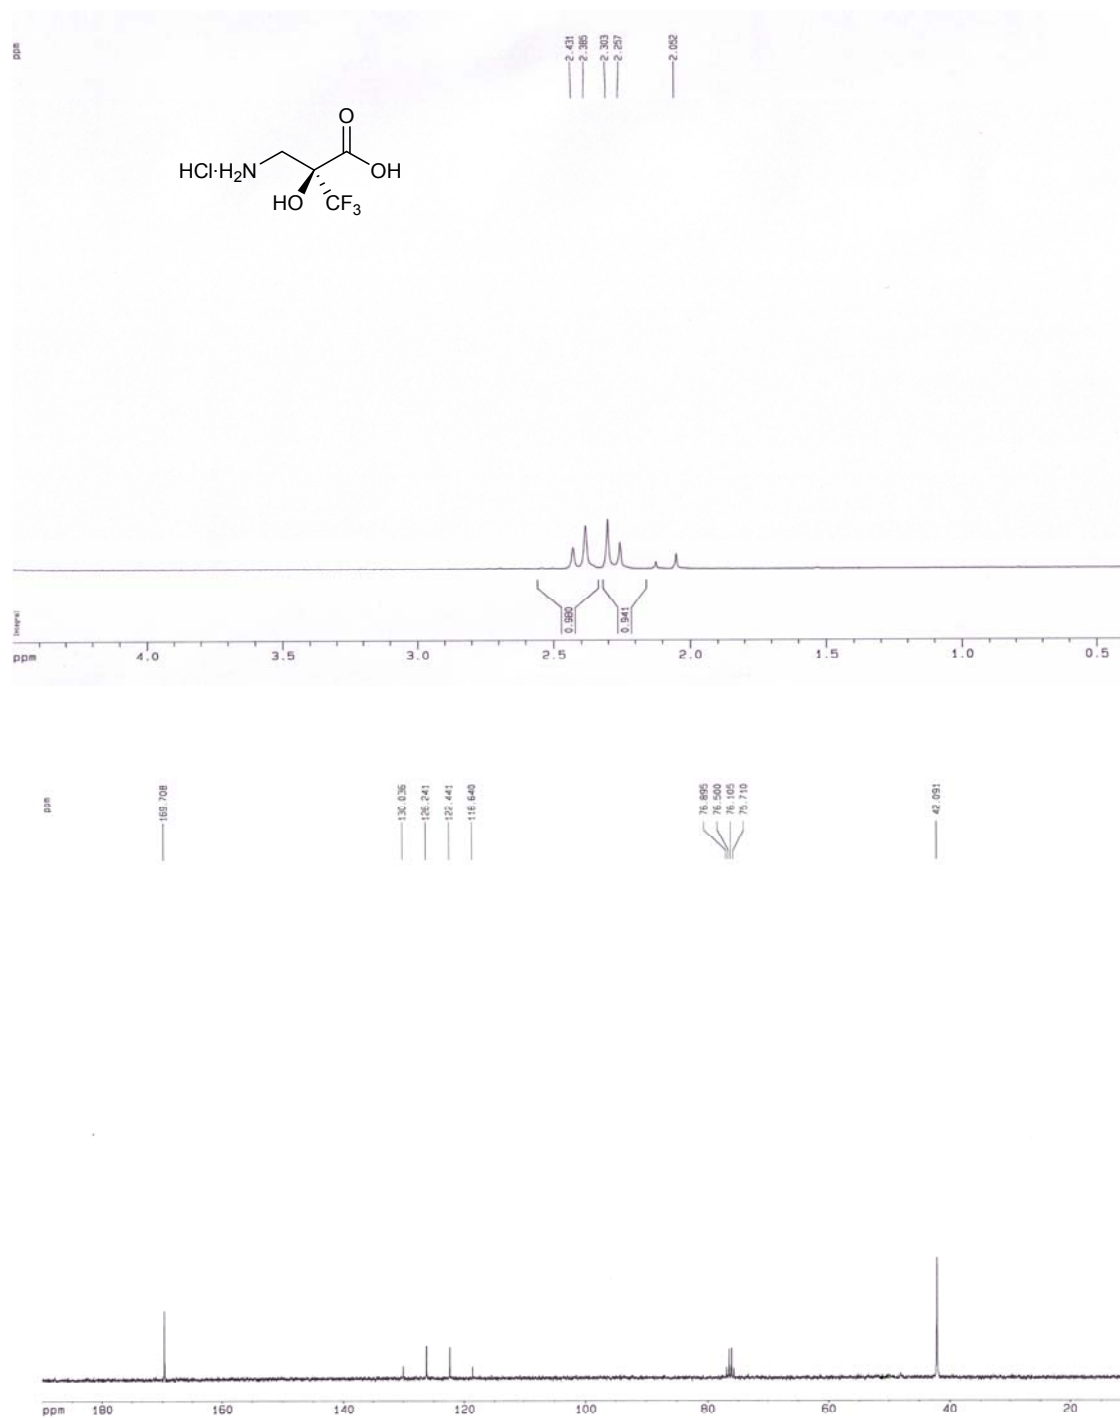

**(S)-4-(Trifluoromethyl)-2,2-dioxo-2λ<sup>6</sup>-[1,3,2]dioxathiolane-4-carboxylic acid N-methoxy-N-methylamide [(S)-6c]**

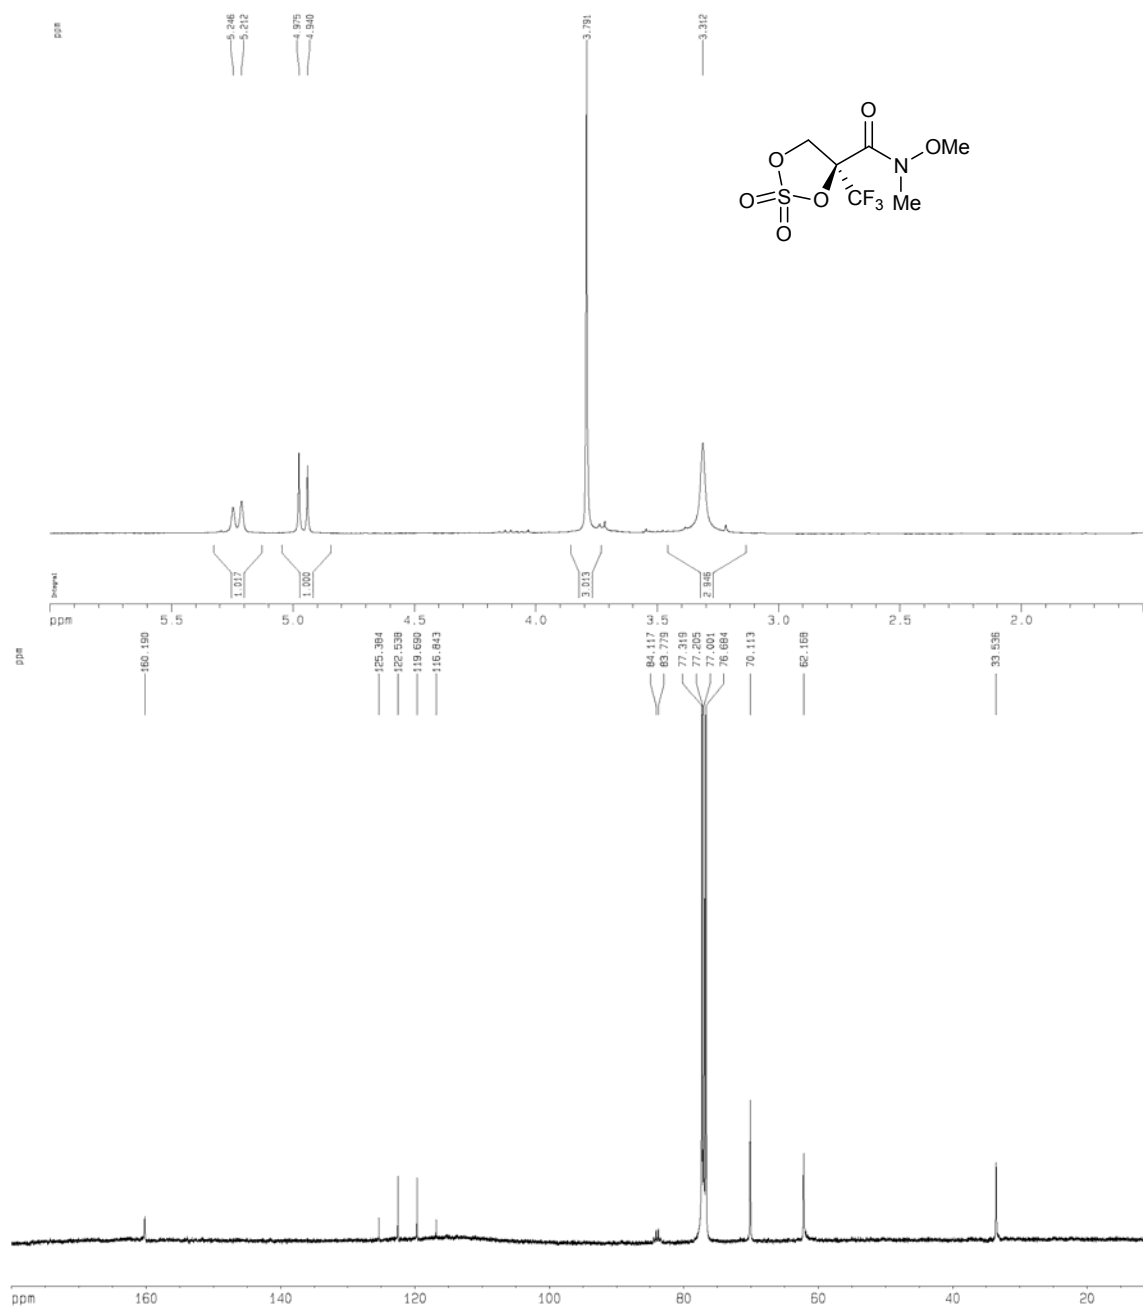

S20

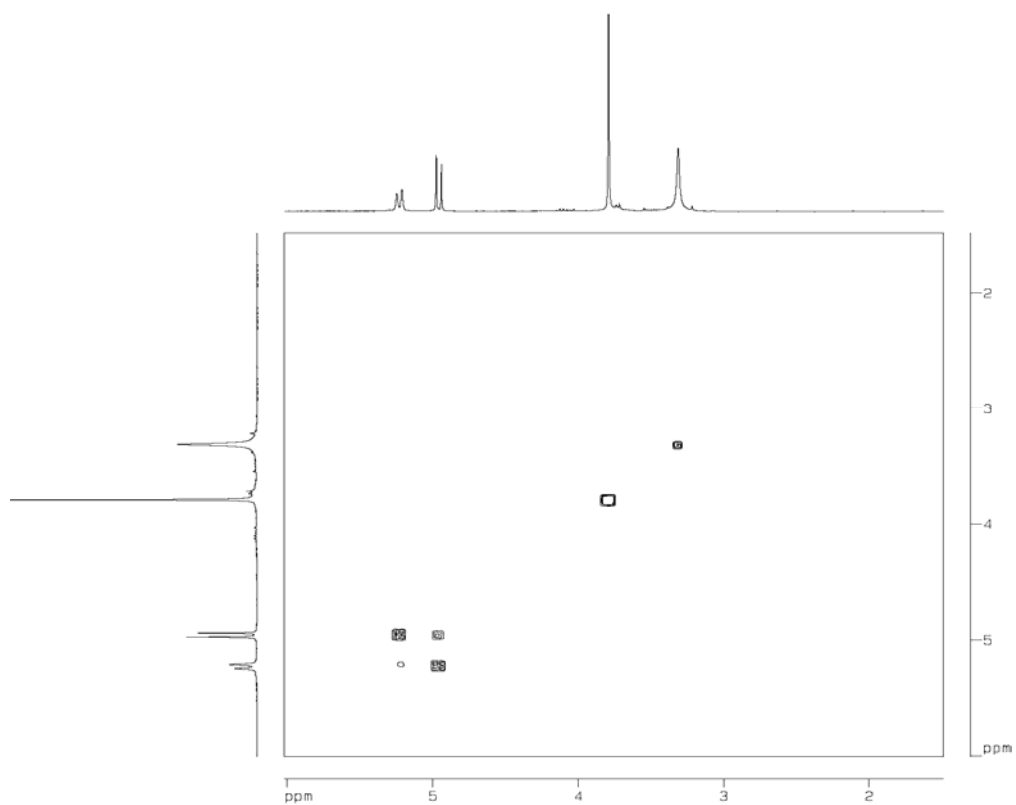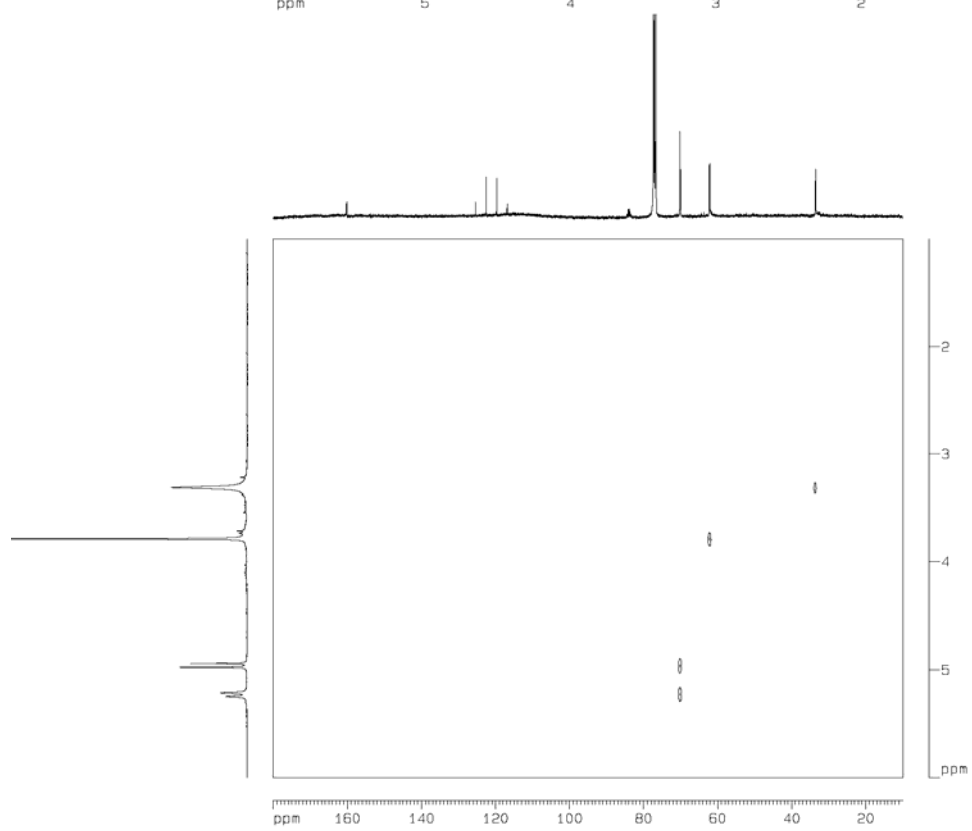

**Methyl (*S*)-4-(trifluoromethyl)-2,2-dioxo-2 $\lambda^6$ -[1,3,2]dioxathiolane-4-carboxylate****[(*S*)-6d]**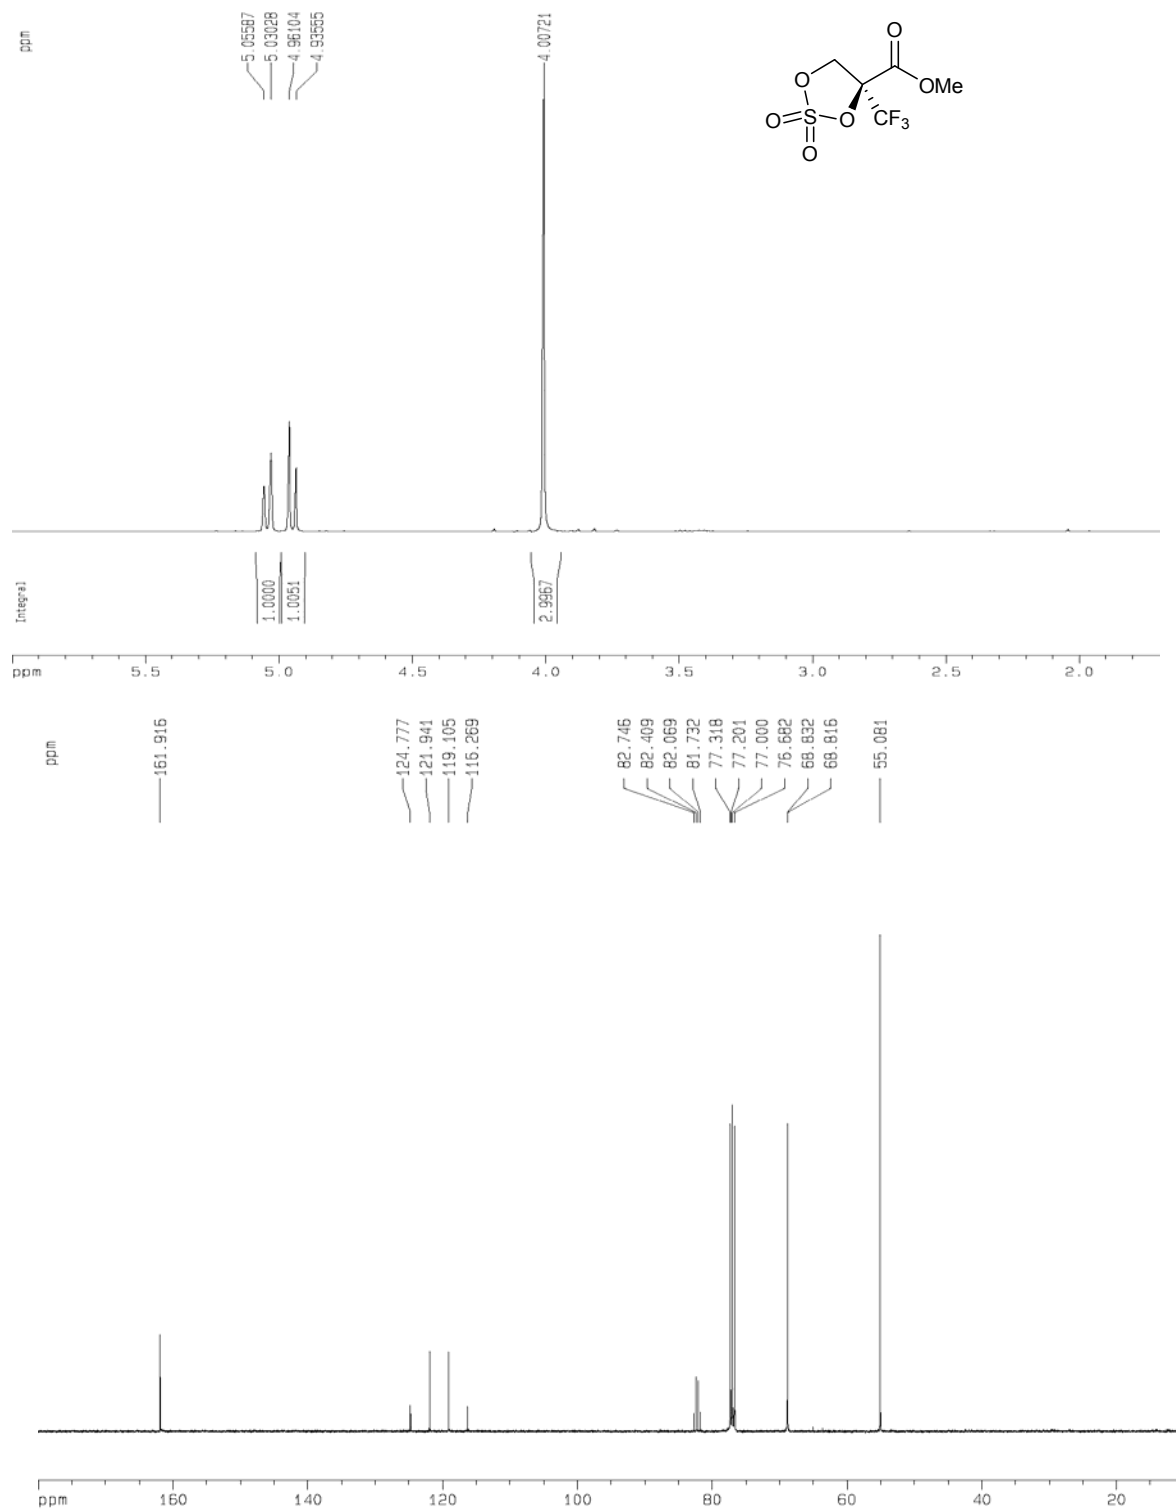

S22

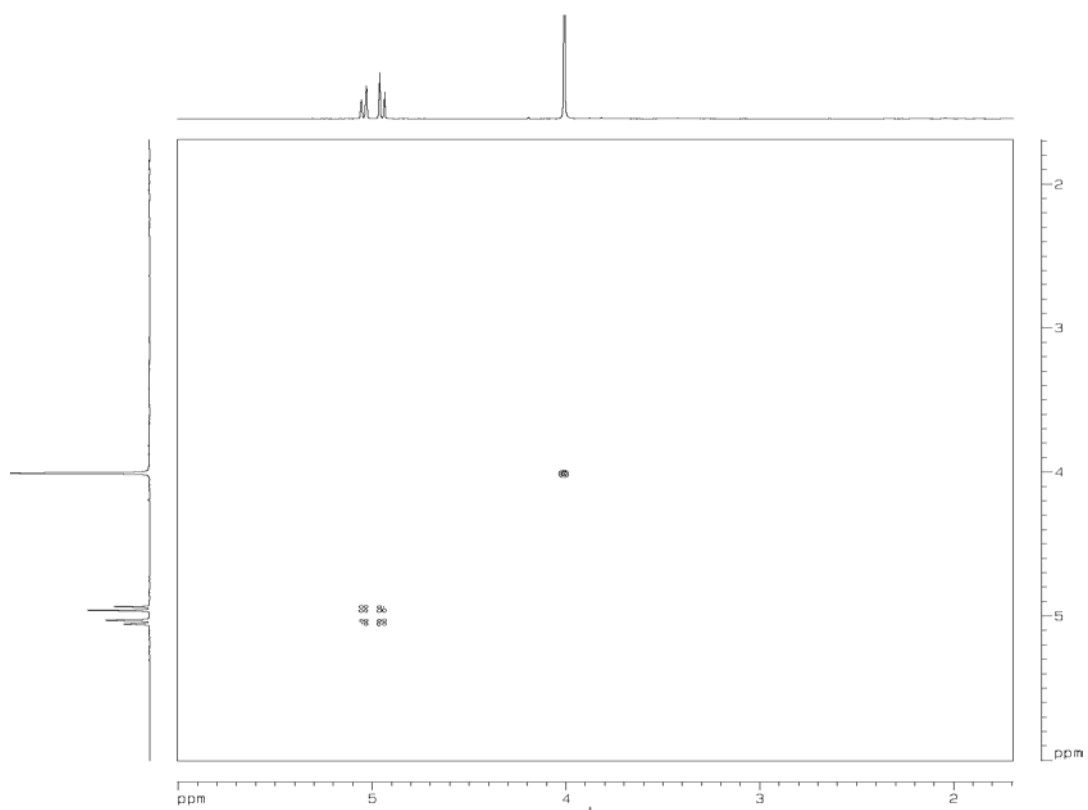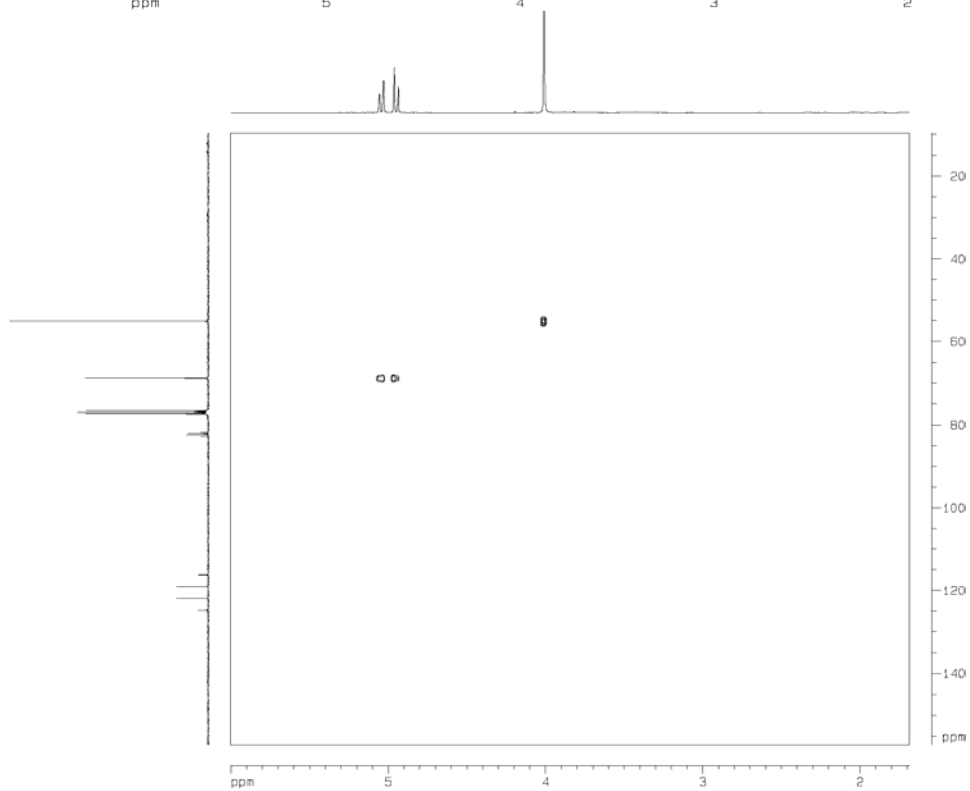

**(S)-3-Azido-2-(trifluoromethyl)-2-hydroxy-N-methoxy-N-methylpropanamide****[(S)-7c]**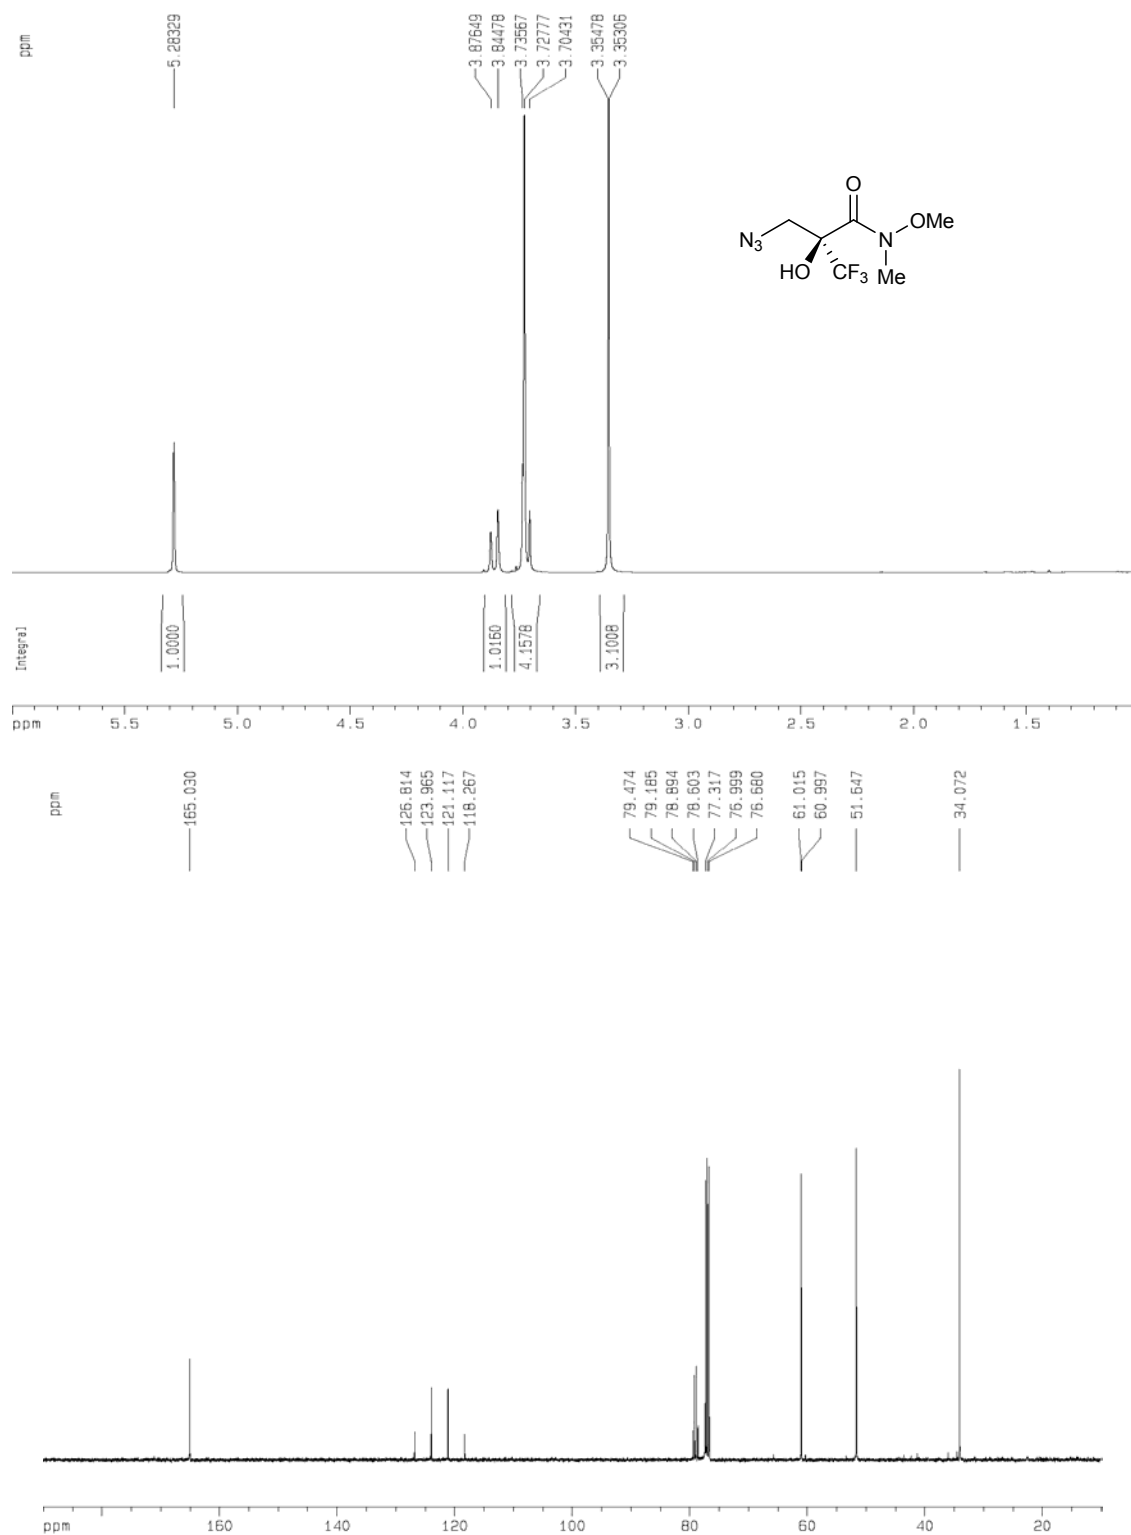

S24

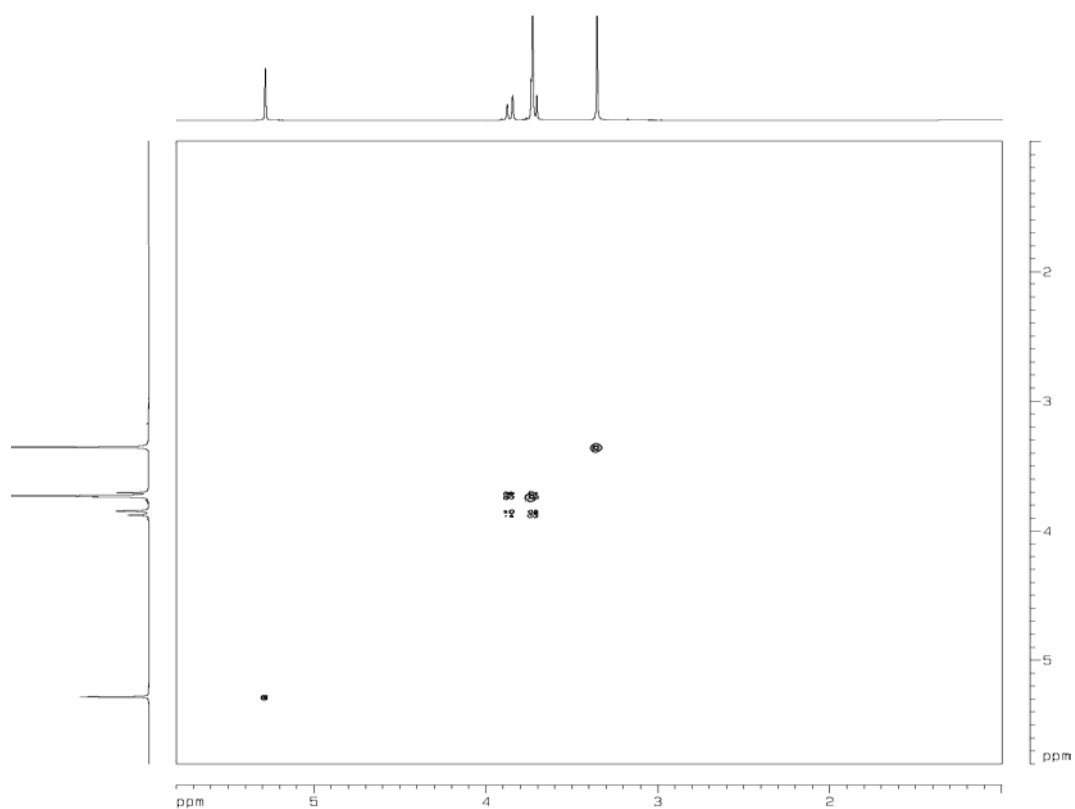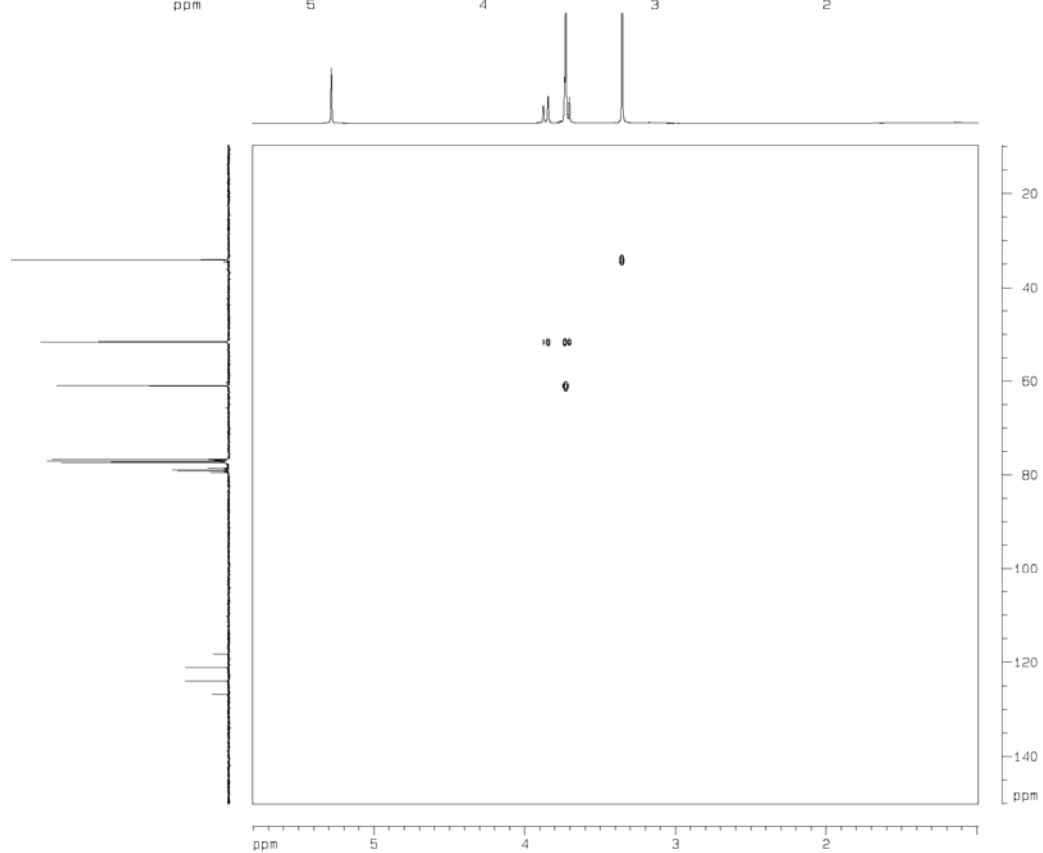



**(S)-Methyl 3-azido-2-(trifluoromethyl)-2-hydroxypropanoate [(S)-7d]**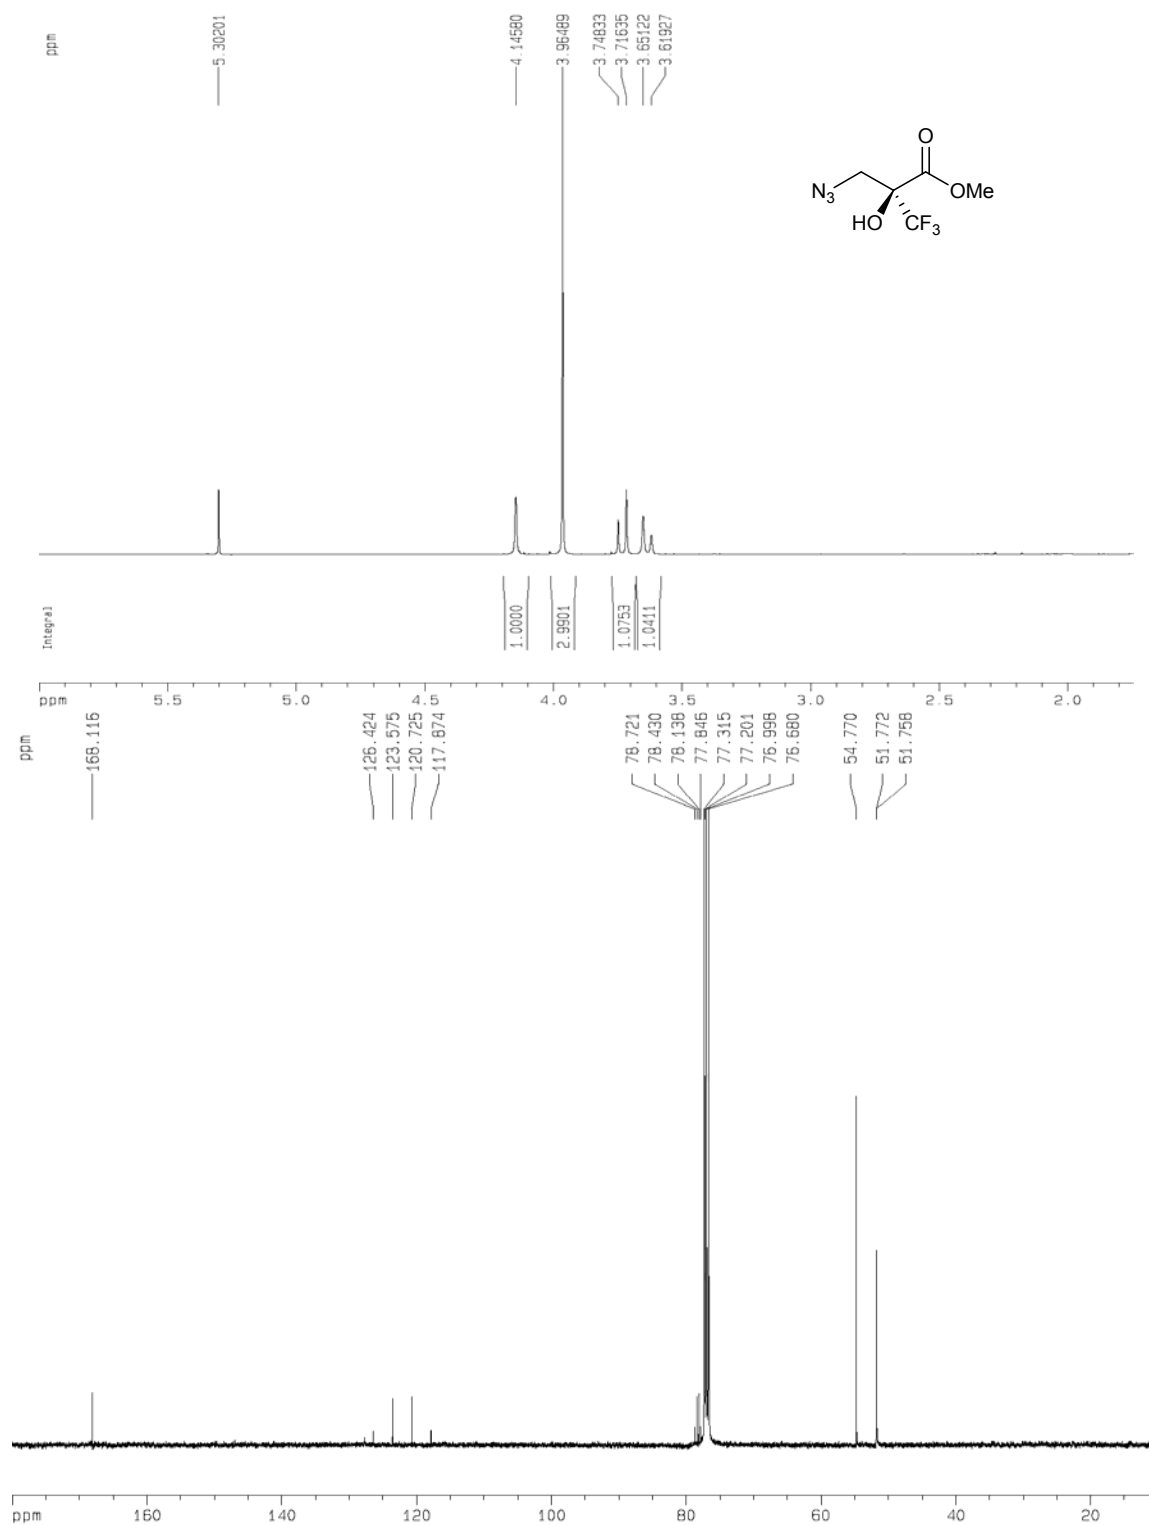

S26

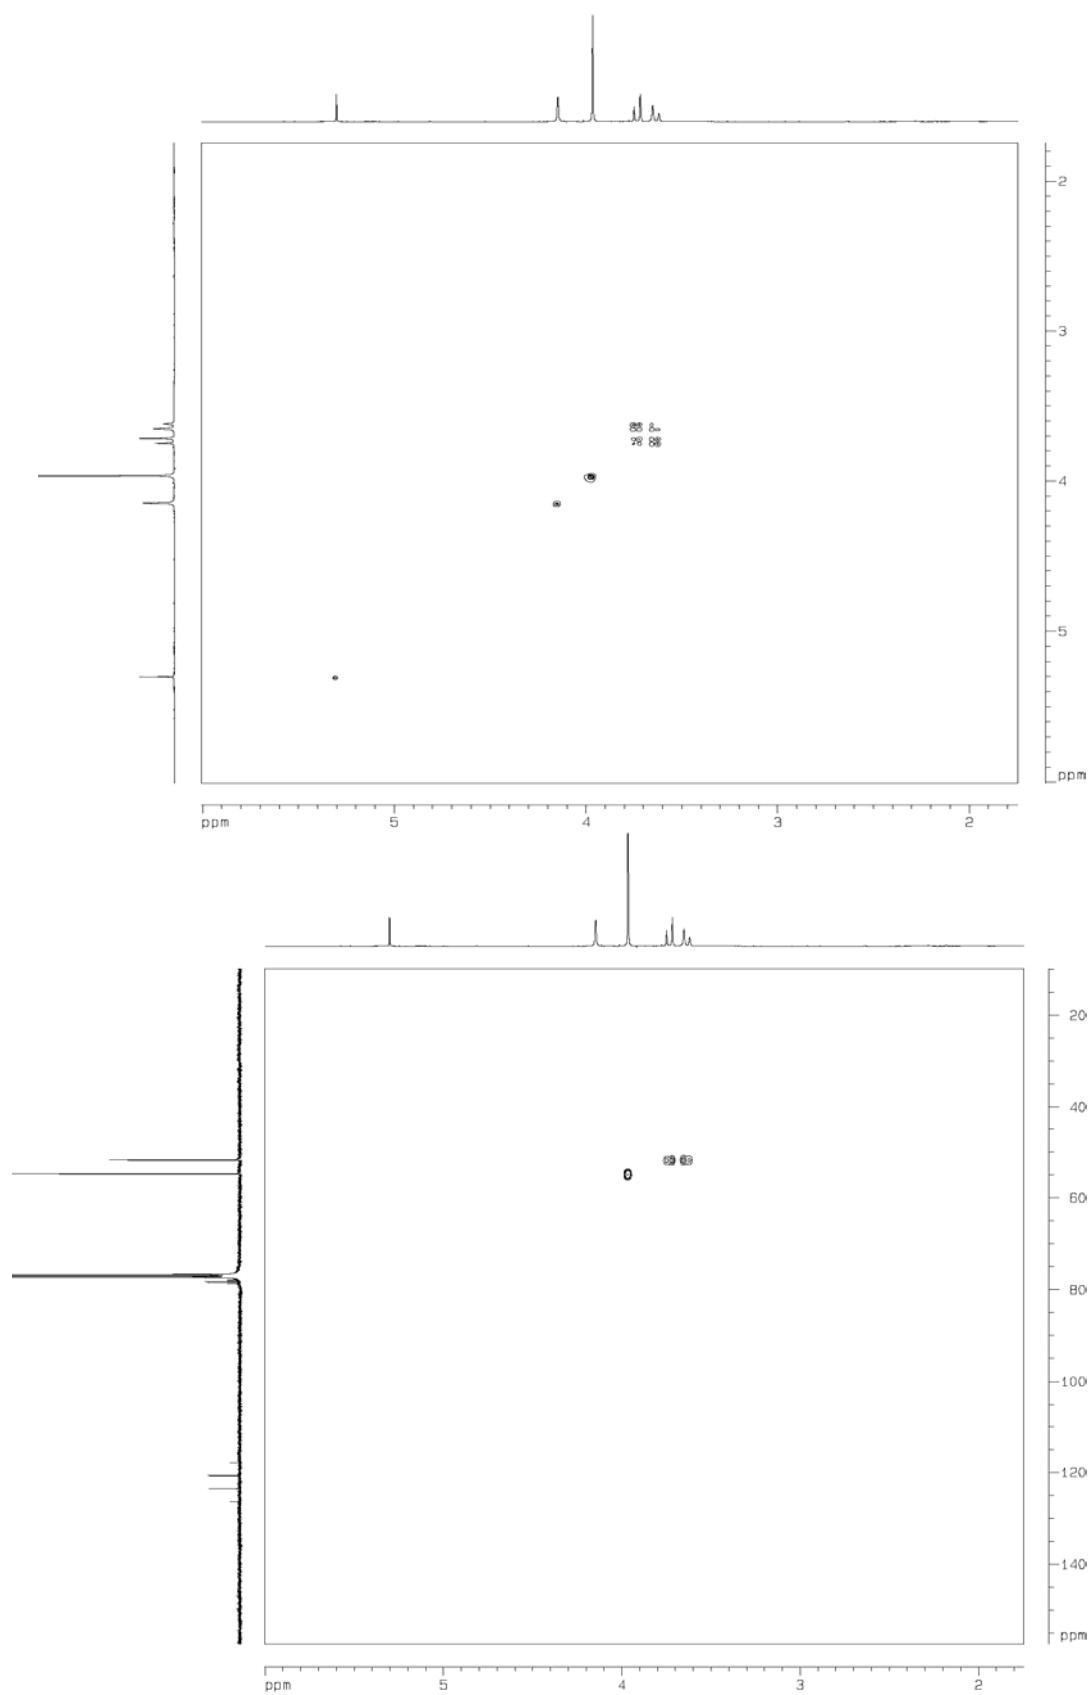

**(S)-2-(Trifluoromethyl)isoserine [(S)-1]**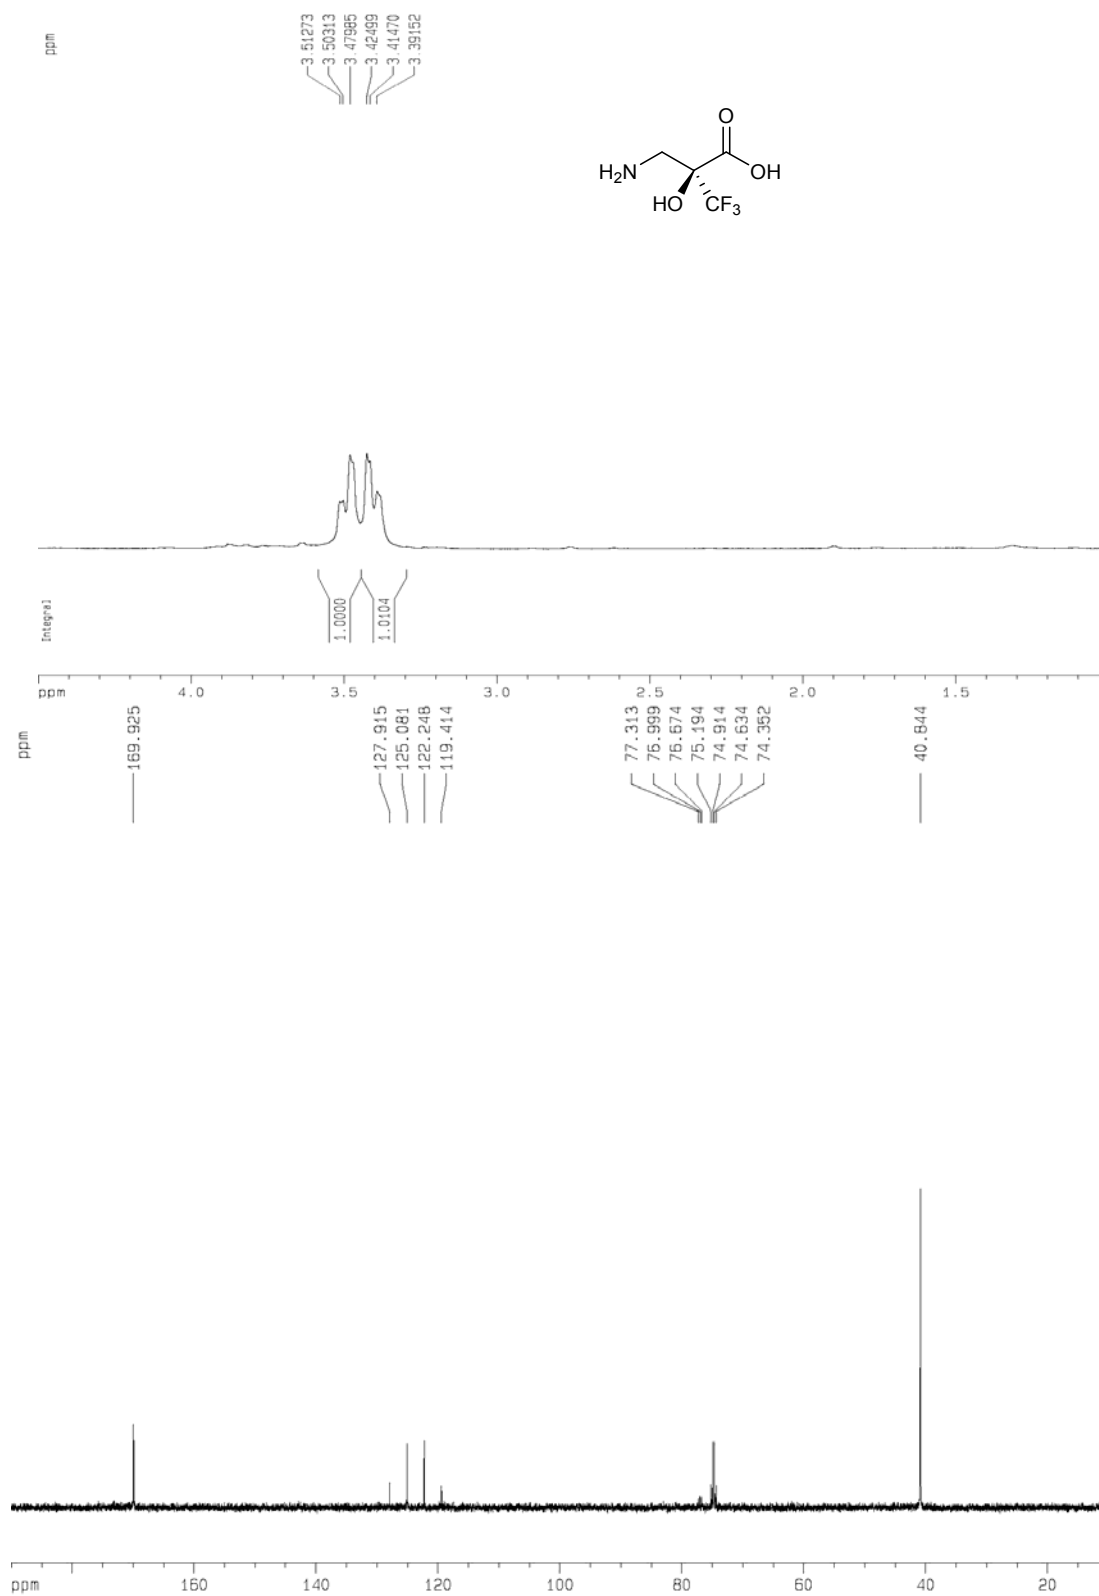

S28

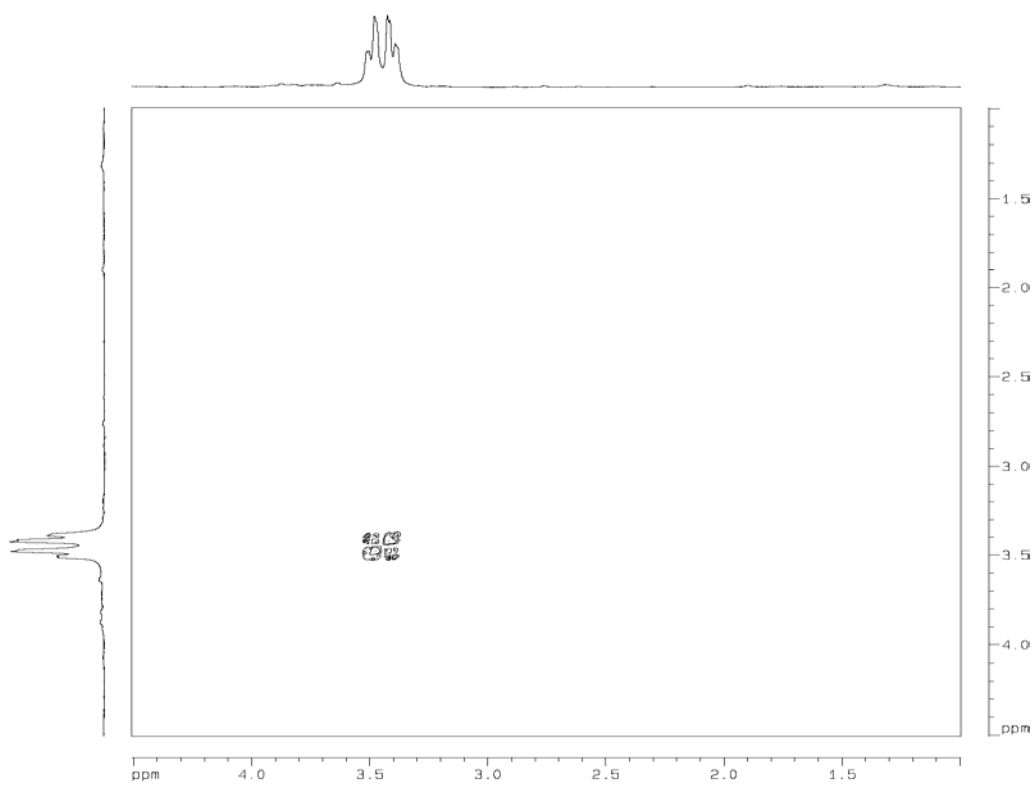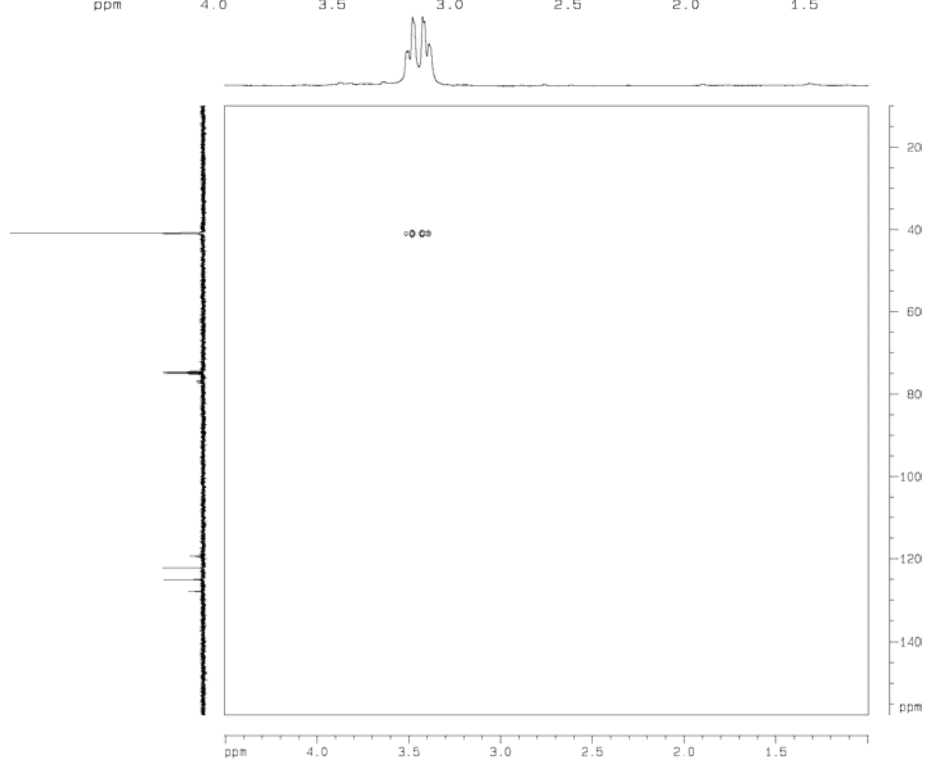

**(*S*)-*N*-(Tosyl)phenylalaninyl (*S*)-2-(trifluoromethyl)isoserine methyl ester [(*S,S*)-8]**

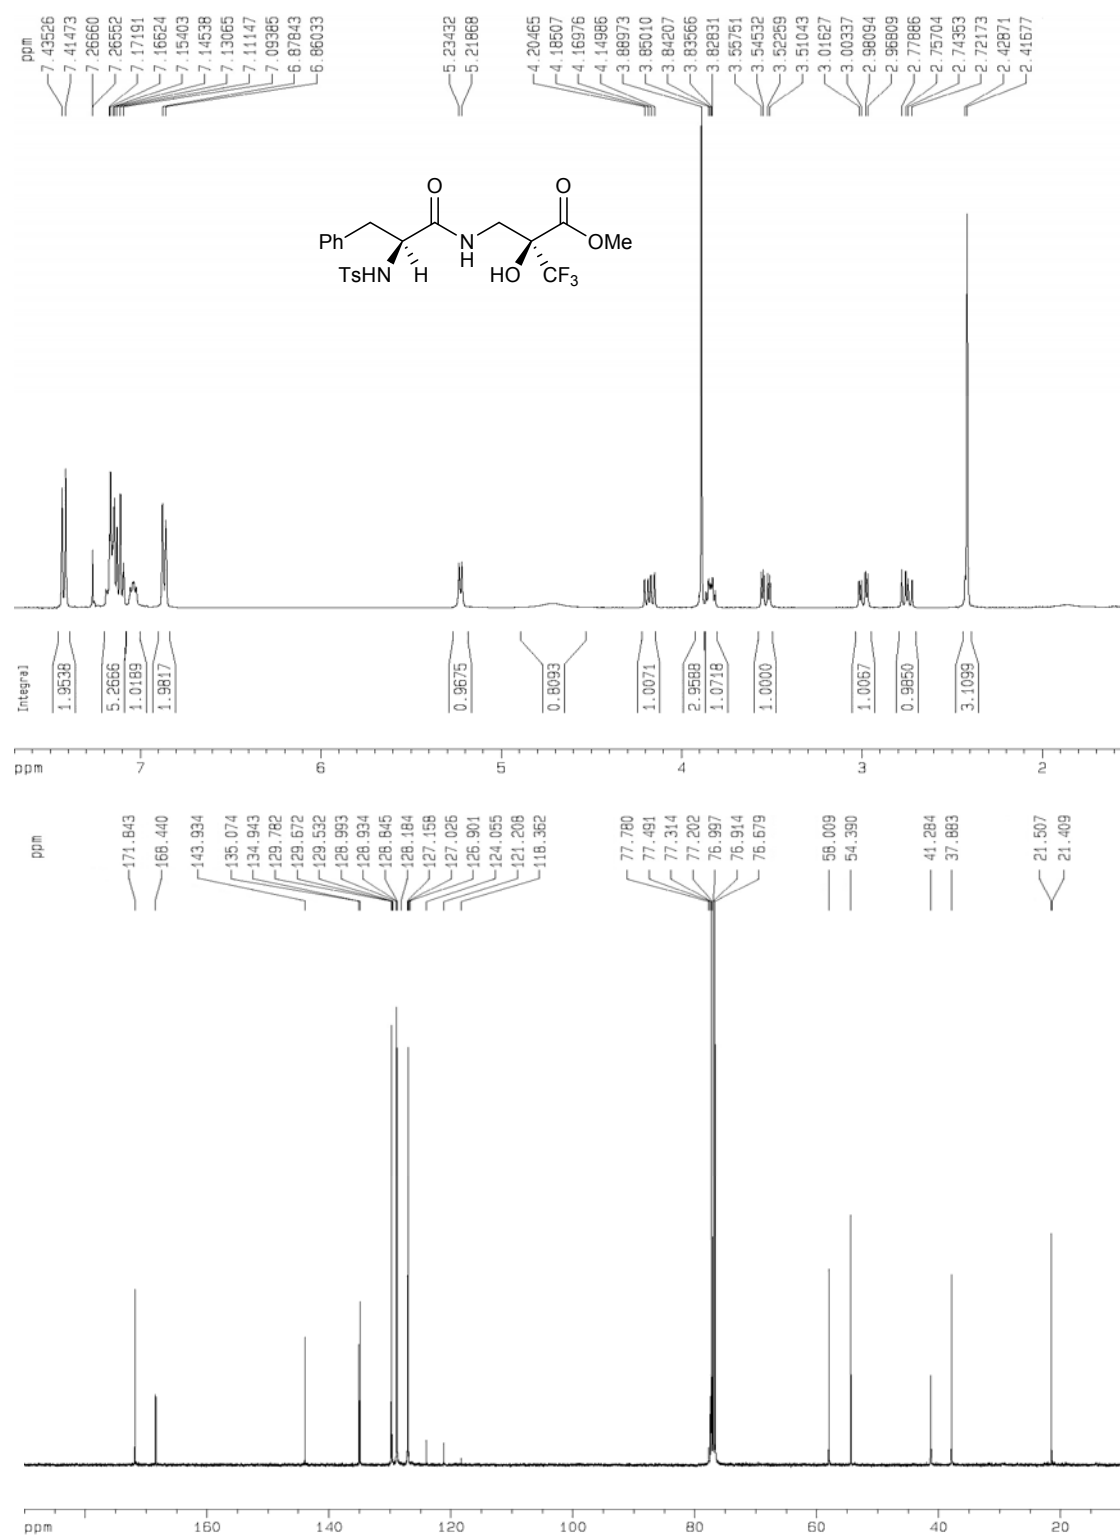

S30

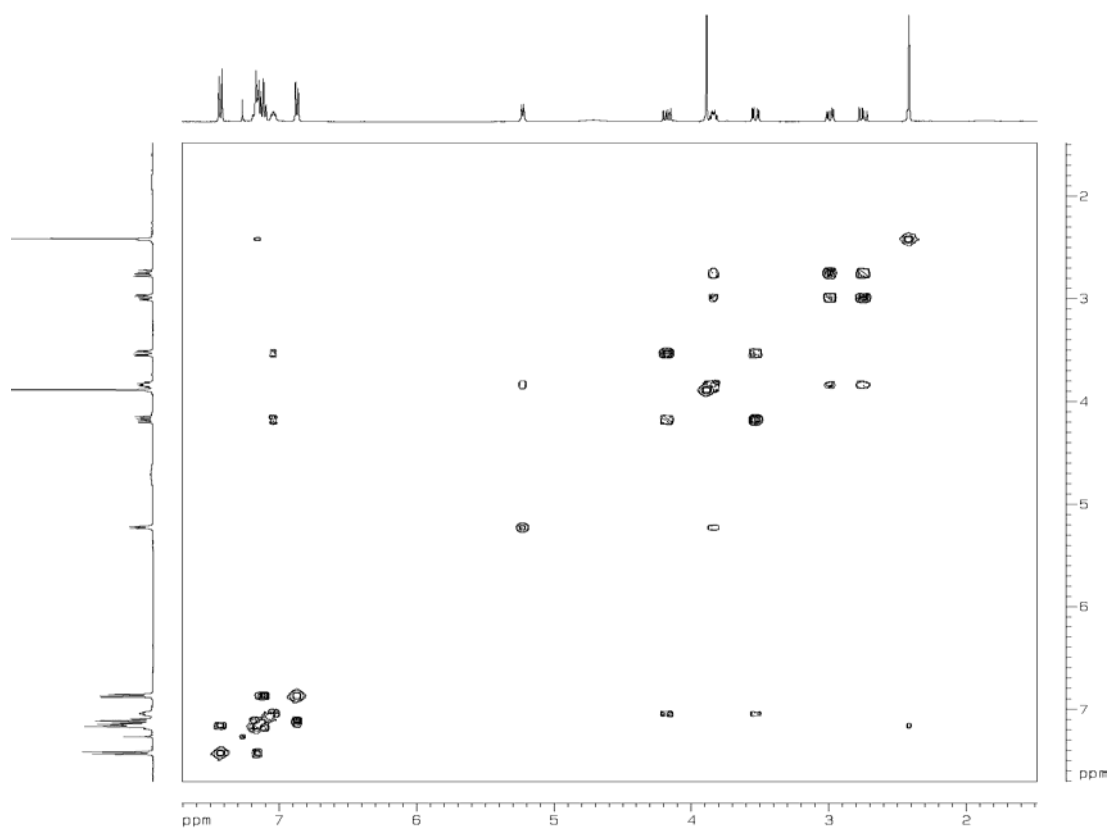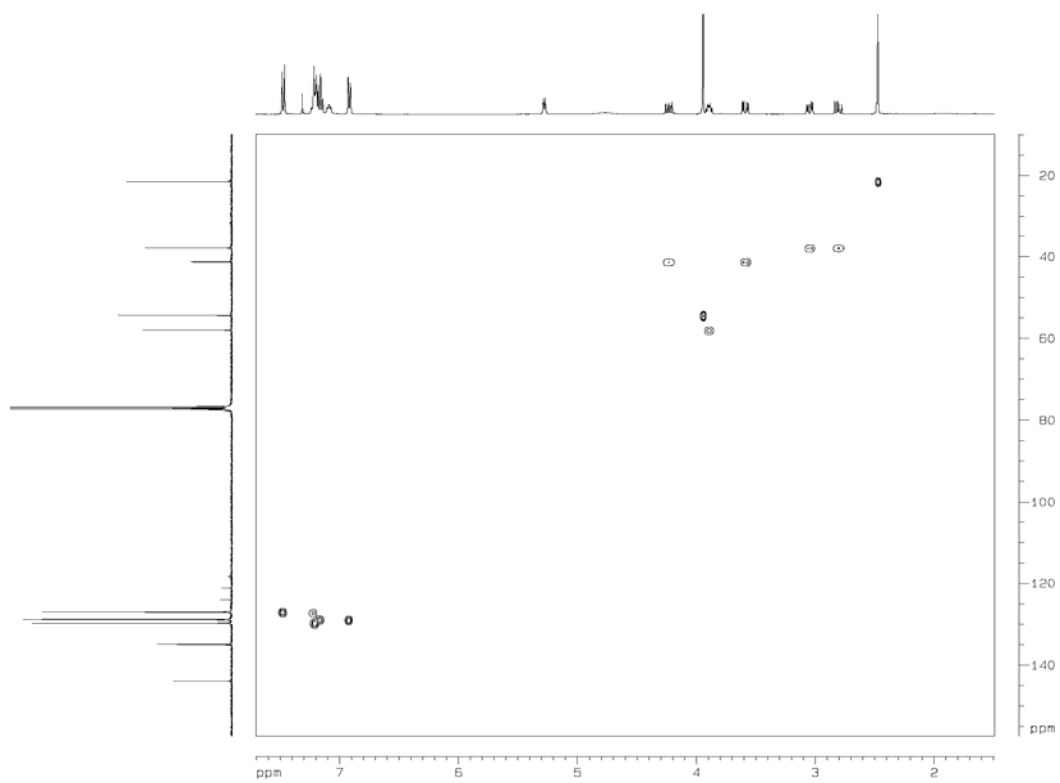

**Enantiomeric excess for Sharpless asymmetric dihydroxylation  
determined by GC-MS**

For compound **4b**.  $\beta$ -DEX™ column (30 m  $\times$  0.25mm  $\times$  0.25  $\mu$ m); T= 110 °C isotherm.

Tdet. = Tinlet = 225 °C;

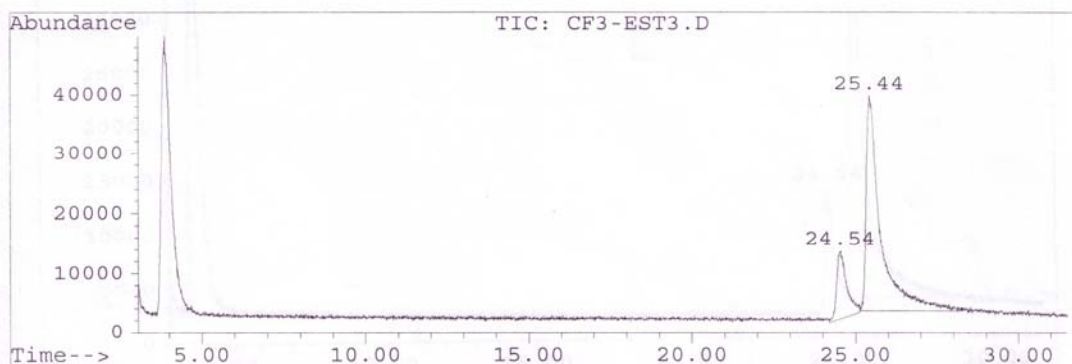

| Retention Time         | Area     | Area % | Ratio % | Type | Width |
|------------------------|----------|--------|---------|------|-------|
| Total Ion Chromatogram |          |        |         |      |       |
| 24.543                 | 2458357  | 17.810 | 21.670  | M    | 0.354 |
| 25.438                 | 11344621 | 82.190 | 100.000 | M    | 0.521 |

For compound **4c**.  $\beta$ -DEX™ column (30 m  $\times$  0.25mm  $\times$  0.25  $\mu$ m); T= 110 °C isotherm.

Tdet. = Tinlet = 225 °C;

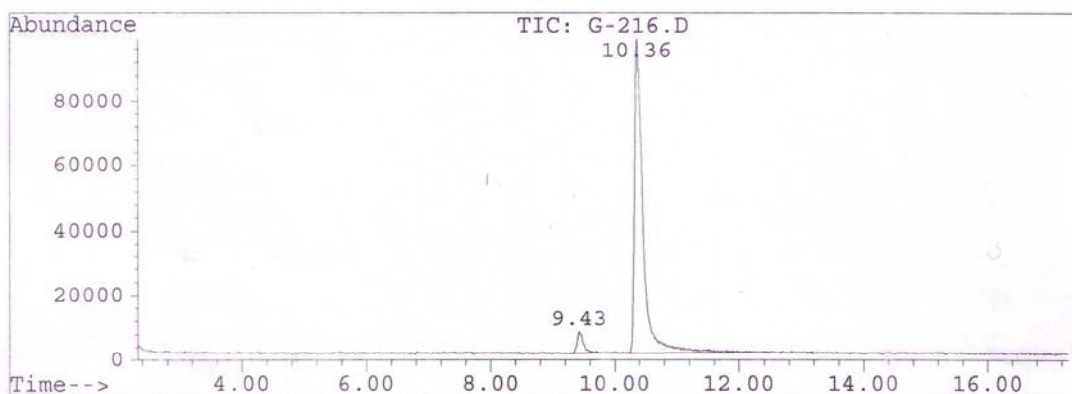

| Retention Time         | Area    | Area % | Ratio % | Type | Width |
|------------------------|---------|--------|---------|------|-------|
| Total Ion Chromatogram |         |        |         |      |       |
| 9.431                  | 488109  | 4.899  | 5.151   | M    | 0.120 |
| 10.359                 | 9475779 | 95.101 | 100.000 | M    | 0.163 |

## Computational energy data and the coordinates for structures

### Computational Details

In order to understand the behavior of this kind of fluorinated cyclic sulfates in the ring-opening reaction with the azide ion, we performed a theoretical study.

All ground state and transition state (TS) geometries were located using hybrid density functional theory (B3LYP)<sup>1</sup> and the 6-31+G(d) basis implemented in Gaussian 98.<sup>2</sup> All the TS geometries were fully optimized and characterized by frequency analysis. In all cases single-point energy calculations at the B3LYP/6-311++G(2d,p) level were carried out on the B3LYP/6-31+G(d) geometries. Furthermore, solvent effects were taken into account through single point energy calculations with the Isodensity Polarized Surface Continuum Model (IPCM) method,<sup>3</sup> as implemented in Gaussian 98, at the B3LYP/6-31+G(d) level, using the dielectric permittivity of dimethylformamide (38.25), which was the solvent used in the experiments.

Two competitive S<sub>N</sub>2 pathways were examined; azide attack at the “free” (**f**) secondary position and at the “hindered” (**h**) quaternary position. Each TS was located in the two possible carbonyl conformations, namely *syn* (**s**) and *anti* (**a**) with regard to the trifluoromethyl group. This leads to four possible TS for each sulfate and these are denoted as **TSc-d\_af**, **TSc-d\_ah**, **TSc-d\_sf** and **TSc-d\_sh**, respectively. Several geometrical features of the minimum energy TS are shown in Figure SI-1 and the energetic results are gathered in Table SI-1.

Only Gibbs free energies are used for the discussion on the relative stabilities of the TS considered. These energies were obtained using the following correction formula:

$$\Delta\Delta G^\ddagger = \Delta\Delta E_{\text{basis}} + \Delta\Delta G_{298} + \Delta\Delta G_{\text{solv}}$$

where  $\Delta\Delta E_{\text{basis}}$  is the relative energy at the B3LYP/6-311++G(2d,p)/B3LYP/6-31+G(d) level,  $\Delta\Delta G_{298}$  represents the thermal and entropic corrections at 298 K, calculated at the B3LYP/6-31+G(d) level, and

<sup>1</sup> Becke, A. D. *J. Chem. Phys.* **1993**, *98*, 1372–1377.

<sup>2</sup> Gaussian 98, Revision A.11, M. J. Frisch, G. W. Trucks, H. B. Schlegel, G. E. Scuseria, M. A. Robb, J. R. Cheeseman, V. G. Zakrzewski, J. A. Montgomery, Jr., R. E. Stratmann, J. C. Burant, S. Dapprich, J. M. Millam, A. D. Daniels, K. N. Kudin, M. C. Strain, O. Farkas, J. Tomasi, V. Barone, M. Cossi, R. Cammi, B. Mennucci, C. Pomelli, C. Adamo, S. Clifford, J. Ochterski, G. A. Petersson, P. Y. Ayala, Q. Cui, K. Morokuma, P. Salvador, J. J. Dannenberg, D. K. Malick, A. D. Rabuck, K. Raghavachari, J. B. Foresman, J. Cioslowski, J. V. Ortiz, A. G. Baboul, B. B. Stefanov, G. Liu, A. Liashenko, P. Piskorz, I. Komaromi, R. Gomperts, R. L. Martin, D. J. Fox, T. Keith, M. A. Al-Laham, C. Y. Peng, A. Nanayakkara, M. Challacombe, P. M. W. Gill, B. Johnson, W. Chen, M. W. Wong, J. L. Andres, C. Gonzalez, M. Head-Gordon, E. S. Replogle, and J. A. Pople, Gaussian, Inc., Pittsburgh PA, 2001.

<sup>3</sup> Foresman, J. B.; Keith, T. A.; Wiberg, K. B.; Snoonian, J.; Frisch, M. J. *J. Phys. Chem.* **1996**, *100*, 16098–16104.



$\Delta\Delta G_{\text{solv}}$  is the solvation correction (relative solvation free energies), calculated at the IPCM/B3LYP/6-31+G(d) level.

As far as substrates (*S*)-**6c** and (*S*)-**6d** are concerned, the TS obtained for the  $S_N2$  reaction on “free” position (**TSc\_sf** and **Tsd\_sf**, respectively) were considerably lower in energy (4.82 Kcal/mol and 5.94 Kcal/mol more stable) than that resulting from the nucleophilic attack on “hinderend” position (**TSc\_ah** and **Tsd\_ah**, respectively). This situation is in agreement with the experimentally observed regioselectivity.

NOTE: Stereochemistry is ignored for simplicity

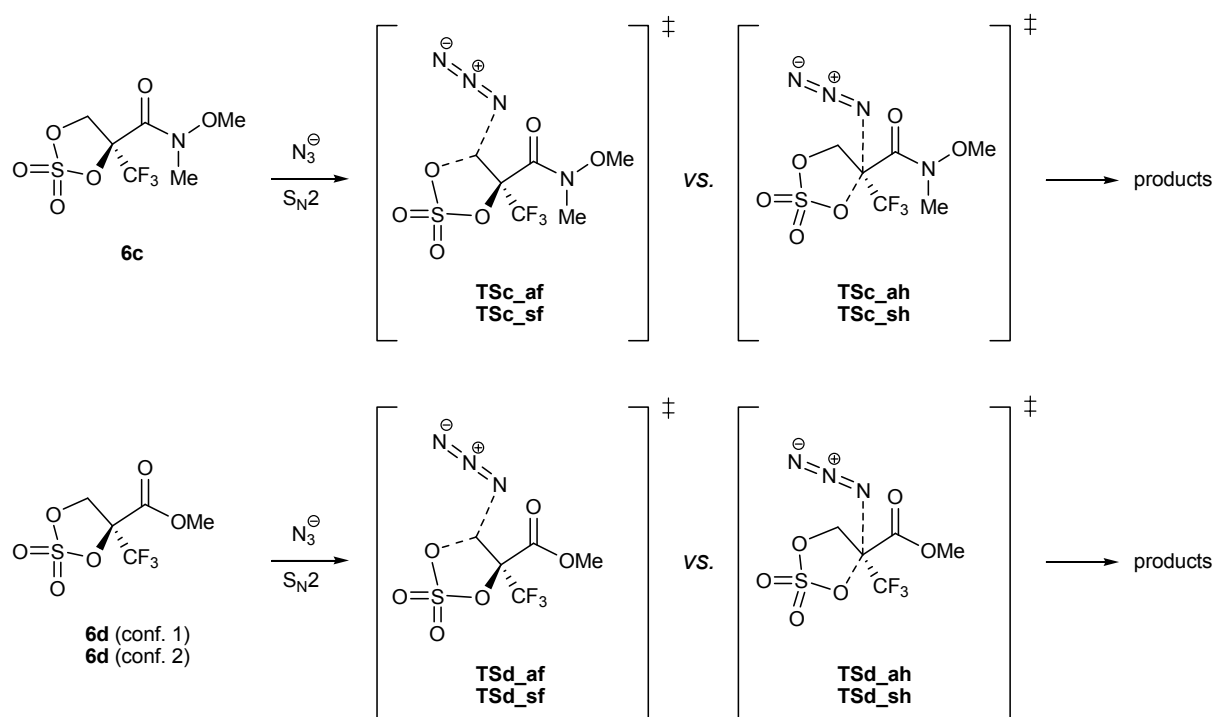

**Table SI-1. Calculated energies, entropies, Gibbs free energies and lowest frequencies of the reactants and transition structures (B3LYP/6-31+G(d) optimized geometries).**

|                   | $E_0$ (B3LYP/6-31+G(d))<br>(a.u.) <sup>a</sup> | Lowest freq.<br>(cm <sup>-1</sup> ) | S<br>(cal mol <sup>-1</sup> K <sup>-1</sup> ) | $G_{298}$ (B3LYP/6-31+G(d))<br>(a.u.) | $E_{\text{IPCM}}$ (B3LYP/6-31+G(d))<br>(a.u.) | $E_{\text{basis}}$ (B3LYP/6-311++G(2d,p))<br>(a.u.) |
|-------------------|------------------------------------------------|-------------------------------------|-----------------------------------------------|---------------------------------------|-----------------------------------------------|-----------------------------------------------------|
| $\text{N}_3^-$    | -164,244683                                    | 618.7                               | 43.6                                          | -164,252070                           | -164,345127                                   | -164,289798                                         |
| <b>6c</b>         | -1437.1553473                                  | 32.2                                | 133.9                                         | -1437.035306                          | -1437.1743712                                 | -1437.5113275                                       |
| <b>6d</b> (cf. 1) | -1342,5517623                                  | 32.2                                | 122.3                                         | -1342,473141                          | -1342,5694346                                 | -1342,8829437                                       |
| <b>6d</b> (cf. 2) | -1342,5493817                                  | 22.0                                | 122.9                                         | -1342,471180                          | -1342,5677627                                 | -1342,8806749                                       |
| <b>TSc_sf</b>     | -1601,4116550                                  | 483.7i                              | 151.1                                         | -1601,286744                          | -1601,4904122                                 | -1601,8122998                                       |
| <b>TSc_sh</b>     | -1601,3999335                                  | 370.9i                              | 148.9                                         | -1601,273693                          | -1601,4774615                                 | -1601,8007655                                       |
| <b>TSc_af</b>     | -1601,4058438                                  | 504.6i                              | 151.2                                         | -1601,281087                          | -1601,4820702                                 | -1601,8059319                                       |
| <b>TSc_ah</b>     | -1601,4008135                                  | 393.7i                              | 147.3                                         | -1601,273987                          | -1601,4849121                                 | -1601,8011866                                       |
| <b>TSd_sf</b>     | -1506,8152859                                  | 500.0i                              | 139.1                                         | -1506,731503                          | -1506,8948209                                 | -1507,1906104                                       |
| <b>TSd_sh</b>     | -1506,8035882                                  | 376.0i                              | 137.3                                         | -1506,718721                          | -1506,8816253                                 | -1507,1791442                                       |
| <b>TSd_af</b>     | -1506,8128216                                  | 502.1i                              | 139.8                                         | -1506,729427                          | -1506,8898273                                 | -1507,1880992                                       |
| <b>TSd_ah</b>     | -1506,8023411                                  | 380.4i                              | 137.7                                         | -1506,717742                          | -1506,8860671                                 | -1507,1777738                                       |

<sup>a</sup> 1 a.u. = 627.5 kcal mol<sup>-1</sup>

**Figure SI-1. Minimum energy TS calculated with 6c and 6d and azide anion. Relative energies shown in brackets**

were obtained by using the following above-mentioned correction formula:  $\Delta\Delta G^\ddagger = \Delta\Delta E_{\text{basis}} + \Delta\Delta G_{298} + \Delta\Delta G_{\text{solv}}$

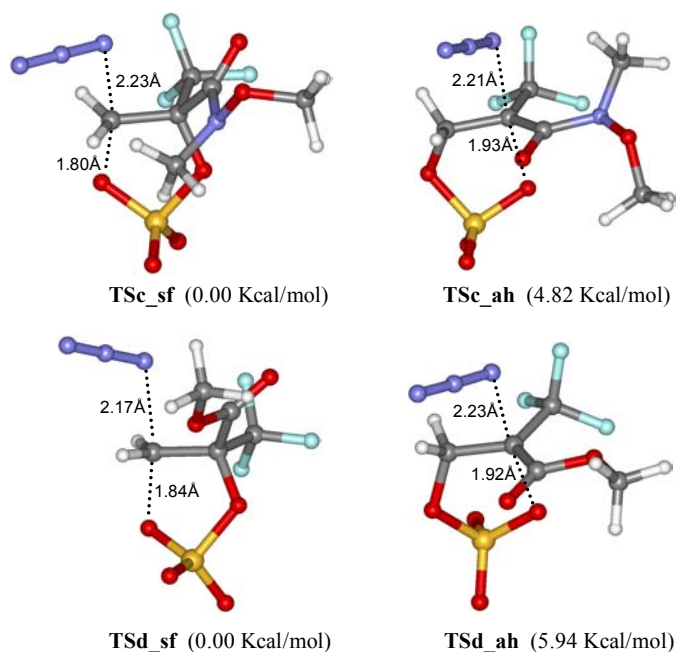

**B3LYP/6-31+G (d) geometries****Azide anion**

|   |           |           |          |
|---|-----------|-----------|----------|
| N | 1.112410  | 0.411590  | 0.000000 |
| N | 0.000000  | 0.000350  | 0.000000 |
| N | -1.112410 | -0.411940 | 0.000000 |

**6c**

|   |           |           |           |
|---|-----------|-----------|-----------|
| C | -0.249348 | 0.539788  | 0.256074  |
| C | -1.070221 | 0.238613  | 1.539050  |
| O | -1.445023 | -1.147288 | 1.403911  |
| S | -1.866648 | -1.436260 | -0.149281 |
| O | -0.826467 | -0.275398 | -0.770402 |
| O | -3.225998 | -1.011431 | -0.412905 |
| O | -1.386917 | -2.745795 | -0.527276 |
| C | -0.438290 | 2.016818  | -0.166068 |
| C | 1.266016  | 0.229153  | 0.521788  |
| N | 2.015740  | -0.323958 | -0.474101 |
| C | 1.859319  | -0.281568 | -1.925444 |
| O | 1.689935  | 0.434805  | 1.651694  |
| O | 3.367492  | -0.496800 | -0.144647 |
| C | 3.580725  | -1.739225 | 0.548952  |
| H | -0.452700 | 0.321680  | 2.430008  |
| H | -1.967648 | 0.859291  | 1.602978  |
| H | 4.664688  | -1.800178 | 0.668235  |
| H | 3.219273  | -2.583253 | -0.049717 |
| H | 3.096704  | -1.721839 | 1.529268  |
| H | 2.490283  | 0.514940  | -2.334444 |
| H | 0.820991  | -0.109645 | -2.192387 |
| H | 2.178683  | -1.243945 | -2.334220 |
| F | 0.315980  | 2.327047  | -1.240943 |
| F | -1.721218 | 2.274739  | -0.476139 |
| F | -0.080035 | 2.834281  | 0.843566  |

**6d (conform. 1)**

|   |           |           |           |
|---|-----------|-----------|-----------|
| O | -1.587311 | 0.390378  | 1.399010  |
| S | -2.134380 | 0.404885  | -0.151922 |
| O | -0.634097 | 0.066509  | -0.810504 |
| C | 0.318341  | -0.283578 | 0.190038  |
| C | -0.485244 | -0.529920 | 1.493573  |
| O | -3.003763 | -0.726256 | -0.402554 |
| O | -2.514535 | 1.756073  | -0.490140 |
| C | 1.026827  | -1.577452 | -0.280266 |
| C | 1.363651  | 0.845979  | 0.397774  |
| O | 1.427149  | 1.667320  | -0.640354 |
| C | 2.387872  | 2.746647  | -0.540734 |
| O | 2.026749  | 0.914223  | 1.409799  |
| H | 0.088676  | -0.261249 | 2.378211  |
| H | -0.857842 | -1.556001 | 1.554544  |
| H | 2.282149  | 3.303083  | -1.470698 |
| H | 3.395511  | 2.337438  | -0.438530 |
| H | 2.151469  | 3.374131  | 0.321415  |
| F | 1.814962  | -2.053880 | 0.707924  |
| F | 1.797955  | -1.353555 | -1.358973 |
| F | 0.132405  | -2.529410 | -0.593236 |

**6d (conform. 2)**

|   |           |           |           |
|---|-----------|-----------|-----------|
| O | 0.816722  | -0.035063 | -0.872817 |
| C | -0.278500 | 0.121206  | 0.021676  |
| C | 0.256469  | -0.192103 | 1.457914  |
| O | 1.678446  | -0.010175 | 1.384547  |
| S | 2.184817  | -0.562430 | -0.077741 |
| C | -1.421350 | -0.833737 | -0.403067 |
| O | -2.307168 | -0.951042 | 0.596385  |
| C | -3.458944 | -1.789623 | 0.330487  |
| C | -0.729234 | 1.601556  | -0.104742 |
| O | 2.190939  | -2.012684 | -0.081767 |
| O | 3.314189  | 0.219060  | -0.514592 |
| O | -1.482191 | -1.379971 | -1.473355 |
| H | 0.024860  | -1.219887 | 1.746494  |
| H | -0.117974 | 0.504420  | 2.206627  |

|   |           |           |           |
|---|-----------|-----------|-----------|
| H | -4.053424 | -1.752199 | 1.242308  |
| H | -3.133621 | -2.809565 | 0.114063  |
| H | -4.018052 | -1.390520 | -0.518590 |
| F | -1.735027 | 1.867616  | 0.759882  |
| F | -1.167204 | 1.870942  | -1.345546 |
| F | 0.284786  | 2.437200  | 0.178123  |

**TSc\_sf**

|   |           |           |           |
|---|-----------|-----------|-----------|
| C | 0.416136  | 1.368897  | 0.212189  |
| C | 0.250098  | -0.145417 | 0.440840  |
| C | -1.224372 | -0.695066 | 0.346750  |
| O | -1.740904 | -1.225081 | 1.312263  |
| O | 1.009677  | -0.875227 | -0.528542 |
| S | 2.270984  | -0.001036 | -1.258517 |
| O | 3.519337  | -0.693767 | -0.961395 |
| O | 2.089776  | 1.306356  | -0.456057 |
| C | 0.824607  | -0.531938 | 1.845351  |
| O | 1.871705  | 0.123077  | -2.664027 |
| N | -1.796800 | -0.734186 | -0.909702 |
| C | -1.555015 | 0.151812  | -2.039863 |
| O | -3.152978 | -1.119121 | -0.883488 |
| C | -3.268927 | -2.539672 | -0.991825 |
| H | 0.702811  | 2.003834  | 1.033230  |
| H | -0.003096 | 1.825457  | -0.667134 |
| H | -2.017595 | 1.134285  | -1.884175 |
| H | -2.000947 | -0.318020 | -2.920311 |
| H | -0.485521 | 0.245301  | -2.224637 |
| H | -4.346038 | -2.730047 | -1.022219 |
| H | -2.827342 | -3.032314 | -0.120238 |
| H | -2.798538 | -2.901897 | -1.915791 |
| N | -1.598033 | 1.878439  | 1.010025  |
| N | -1.878984 | 2.897400  | 0.436116  |
| N | -2.145591 | 3.890002  | -0.126707 |
| F | 0.169068  | 0.060296  | 2.856888  |
| F | 0.814388  | -1.864391 | 2.039956  |
| F | 2.121912  | -0.141816 | 1.943016  |

**TSc\_sh**

|   |           |           |           |
|---|-----------|-----------|-----------|
| O | -1.375566 | -0.510478 | -0.926914 |
| S | -2.464329 | -1.042950 | 0.034469  |
| O | -1.538910 | -1.018706 | 1.417740  |
| C | -0.539648 | 0.022474  | 1.447977  |
| C | -0.068015 | 0.522293  | 0.061292  |
| C | 1.061058  | -0.028178 | -0.802657 |
| O | 1.461955  | 0.625299  | -1.753084 |
| C | -0.602161 | 1.918647  | -0.443375 |
| O | -3.585274 | -0.118015 | 0.208669  |
| O | -2.768177 | -2.456199 | -0.192355 |
| N | 1.677024  | -1.207785 | -0.396440 |
| C | 1.016175  | -2.432572 | 0.043080  |
| H | -0.926813 | 0.872485  | 2.007040  |
| H | 0.286138  | -0.429951 | 1.992729  |
| H | 0.706900  | -3.022663 | -0.828593 |
| H | 0.135069  | -2.212845 | 0.639001  |
| H | 1.727547  | -3.005525 | 0.643966  |
| N | 1.511863  | 1.557146  | 1.270178  |
| N | 2.211957  | 0.796069  | 1.884355  |
| N | 2.894799  | 0.069443  | 2.495364  |
| O | 2.742366  | -1.580488 | -1.247023 |
| C | 3.941547  | -0.881230 | -0.890308 |
| H | 4.718487  | -1.333705 | -1.514027 |
| H | 4.167903  | -1.021059 | 0.172323  |
| H | 3.851031  | 0.184569  | -1.122685 |
| F | 0.321312  | 2.886334  | -0.509389 |
| F | -1.567104 | 2.356441  | 0.410594  |
| F | -1.159916 | 1.856322  | -1.664292 |

**TSc\_af**

|   |           |           |           |
|---|-----------|-----------|-----------|
| C | 0.587536  | 1.470032  | -0.196936 |
| C | 0.215221  | 0.051316  | 0.262198  |
| C | -1.060021 | -0.389224 | -0.569933 |

|   |           |           |           |
|---|-----------|-----------|-----------|
| O | -0.925292 | -0.367332 | -1.777121 |
| O | 1.180409  | -0.924681 | -0.137058 |
| S | 2.658768  | -0.317413 | -0.725068 |
| O | 3.698440  | -0.904428 | 0.119572  |
| O | 2.396632  | 1.168658  | -0.416615 |
| C | 0.244852  | -0.044205 | 1.819424  |
| O | 2.688171  | -0.630410 | -2.152375 |
| N | -2.111549 | -1.060097 | 0.054908  |
| C | -2.929656 | -0.505756 | 1.130229  |
| H | 0.804573  | 2.247941  | 0.513963  |
| H | 0.432511  | 1.704779  | -1.237730 |
| H | -3.301708 | -1.324439 | 1.753860  |
| H | -3.770763 | 0.039998  | 0.687174  |
| H | -2.356789 | 0.196109  | 1.725011  |
| N | -1.444336 | 2.118169  | 0.112809  |
| N | -1.690528 | 2.941568  | -0.734057 |
| N | -1.931173 | 3.748045  | -1.540998 |
| O | -3.008763 | -1.637813 | -0.882991 |
| C | -2.500937 | -2.886660 | -1.355596 |
| H | -3.291858 | -3.280277 | -2.000991 |
| H | -2.319502 | -3.573267 | -0.518790 |
| H | -1.584939 | -2.744414 | -1.937561 |
| F | -0.496636 | 0.890636  | 2.457915  |
| F | 1.507998  | 0.118114  | 2.266594  |
| F | -0.176634 | -1.256148 | 2.253703  |

**TSc\_ah**

|   |           |           |           |
|---|-----------|-----------|-----------|
| C | 0.115442  | -1.321995 | -1.330755 |
| C | -0.020119 | -0.557157 | 0.020984  |
| C | -1.017170 | 0.554250  | 0.340914  |
| N | -1.900814 | 0.973649  | -0.661409 |
| O | -2.629344 | 2.128545  | -0.276667 |
| C | -1.842976 | 3.304771  | -0.484444 |
| C | 0.861532  | -1.056747 | 1.178877  |
| O | 2.254796  | -0.755459 | 1.003170  |
| S | 2.523013  | 0.723062  | 0.292850  |
| O | 2.500609  | 1.760748  | 1.325795  |
| O | 1.253057  | 0.748831  | -0.604736 |
| O | 3.754903  | 0.560080  | -0.479112 |
| O | -0.893404 | 1.154411  | 1.394483  |
| C | -2.838765 | 0.092102  | -1.349369 |
| N | -1.641281 | -1.823840 | 0.831626  |
| N | -1.918100 | -1.621831 | 1.992514  |
| N | -2.215243 | -1.466633 | 3.106619  |
| H | 0.816283  | -2.143425 | 1.236254  |
| H | 0.492975  | -0.601771 | 2.098885  |
| H | -3.771351 | 0.040611  | -0.773212 |
| H | -2.437501 | -0.913150 | -1.425562 |
| H | -3.042281 | 0.494834  | -2.346369 |
| H | -2.513728 | 4.132126  | -0.233572 |
| H | -1.525318 | 3.377099  | -1.532101 |
| H | -0.971922 | 3.317462  | 0.177381  |
| F | -0.717230 | -2.377482 | -1.479135 |
| F | 1.361433  | -1.828948 | -1.449134 |
| F | -0.106416 | -0.523656 | -2.397672 |

**TSd\_sf**

|   |           |           |           |
|---|-----------|-----------|-----------|
| C | -0.147133 | -0.279958 | -1.230629 |
| C | 0.070378  | 0.418340  | 0.123314  |
| O | 1.180958  | -0.135552 | 0.834270  |
| S | 2.179685  | -1.175953 | -0.064729 |
| O | 1.582505  | -0.865401 | -1.450396 |
| C | 0.399234  | 1.929453  | -0.063754 |
| C | -1.141830 | 0.226278  | 1.070573  |
| O | -1.647120 | 1.100257  | 1.736768  |
| O | -1.452109 | -1.075769 | 1.141474  |
| C | -2.549582 | -1.413287 | 2.003816  |
| O | 1.883867  | -2.528093 | 0.410034  |
| O | 3.540787  | -0.673495 | 0.103264  |
| N | -2.212375 | 0.375960  | -1.351300 |
| N | -2.889795 | -0.601735 | -1.541488 |

|   |           |           |           |
|---|-----------|-----------|-----------|
| N | -3.552700 | -1.547248 | -1.723748 |
| H | -0.087742 | 0.274906  | -2.150266 |
| H | -0.557442 | -1.276832 | -1.224860 |
| H | -2.658635 | -2.494326 | 1.916382  |
| H | -3.458375 | -0.907571 | 1.667761  |
| H | -2.322888 | -1.124763 | 3.034455  |
| F | -0.624137 | 2.638237  | -0.567477 |
| F | 0.770721  | 2.500151  | 1.099076  |
| F | 1.441940  | 2.072108  | -0.922186 |

**TSd\_sh**

|   |           |           |           |
|---|-----------|-----------|-----------|
| C | -0.062334 | 1.926395  | 0.281859  |
| C | -0.300743 | 0.409719  | -0.026146 |
| C | 0.116335  | -0.165216 | -1.396364 |
| O | 1.169402  | -1.137165 | -1.304314 |
| S | 2.314608  | -0.739519 | -0.174435 |
| O | 3.265231  | 0.195563  | -0.783479 |
| C | -1.080168 | -0.391121 | 0.984883  |
| O | -1.484366 | 0.026402  | 2.048453  |
| O | -1.222909 | -1.657966 | 0.553318  |
| C | -1.928682 | -2.540194 | 1.436865  |
| O | 2.832454  | -2.011592 | 0.326279  |
| O | 1.360404  | -0.042623 | 0.834006  |
| N | -2.347301 | 0.781606  | -0.860296 |
| N | -2.834958 | -0.181142 | -1.394894 |
| N | -3.319575 | -1.101550 | -1.926672 |
| H | 0.421461  | 0.657432  | -2.047233 |
| H | -0.696390 | -0.722753 | -1.851696 |
| H | -1.958885 | -3.498628 | 0.917853  |
| H | -1.393525 | -2.628640 | 2.386767  |
| H | -2.940840 | -2.168110 | 1.618210  |
| F | -1.113904 | 2.735266  | 0.076586  |
| F | 0.319152  | 2.132194  | 1.553988  |
| F | 0.930208  | 2.386114  | -0.523975 |

**TSd\_af**

|   |           |           |           |
|---|-----------|-----------|-----------|
| C | 0.047046  | 1.225377  | -0.244043 |
| C | -0.077490 | -0.284195 | 0.053503  |
| C | 0.066427  | -1.127069 | -1.249016 |
| C | 0.937511  | -0.653681 | 1.176100  |
| O | 1.889234  | -1.495738 | 0.762930  |
| C | 3.040621  | -1.582161 | 1.618469  |
| O | -1.348603 | -0.614834 | 0.594621  |
| S | -2.574312 | 0.548252  | 0.373874  |
| O | -2.841495 | 1.100580  | 1.701539  |
| O | 0.823224  | -0.216511 | 2.294488  |
| O | -3.665985 | -0.142014 | -0.309950 |
| O | -1.778884 | 1.496197  | -0.541406 |
| N | 2.198805  | 1.214518  | 0.020076  |
| N | 2.836869  | 2.100642  | -0.481881 |
| N | 3.502223  | 2.942297  | -0.946710 |
| H | 0.253210  | 1.582359  | -1.238970 |
| H | 0.079282  | 1.896165  | 0.597622  |
| H | 3.723864  | -2.265170 | 1.112069  |
| H | 2.763818  | -1.964491 | 2.604506  |
| H | 3.483380  | -0.586236 | 1.707846  |
| F | -0.920879 | -0.817702 | -2.121640 |
| F | 1.231270  | -0.924780 | -1.895457 |
| F | -0.041997 | -2.449512 | -0.988827 |

**TSd\_ah**

|   |           |           |           |
|---|-----------|-----------|-----------|
| C | -0.246557 | 1.749915  | -0.289038 |
| C | -0.293526 | 0.183601  | -0.210606 |
| C | 0.331123  | -0.657145 | -1.340674 |
| O | 1.502173  | -1.381609 | -0.930708 |
| S | 2.438824  | -0.555359 | 0.155896  |
| O | 3.314512  | 0.359166  | -0.583827 |
| C | -1.086033 | -0.536931 | 0.845657  |
| O | -1.154668 | -1.747125 | 0.904932  |
| O | -1.662274 | 0.303000  | 1.724747  |
| C | -2.435593 | -0.328576 | 2.753282  |

|   |           |           |           |
|---|-----------|-----------|-----------|
| O | 3.069236  | -1.572245 | 0.994631  |
| O | 1.285320  | 0.190644  | 0.883495  |
| N | -2.249355 | 0.097695  | -1.274592 |
| N | -2.589155 | -1.015868 | -1.591132 |
| N | -2.935863 | -2.080989 | -1.914476 |
| H | 0.570183  | -0.004733 | -2.183275 |
| H | -0.352241 | -1.443238 | -1.649510 |
| H | -2.809698 | 0.488125  | 3.372698  |
| H | -3.264688 | -0.891720 | 2.314492  |
| H | -1.808450 | -1.004852 | 3.341346  |
| F | -1.344503 | 2.350018  | -0.778732 |
| F | -0.030091 | 2.320166  | 0.912495  |
| F | 0.776089  | 2.113868  | -1.103381 |
